# Supplementary material for: Comprehensive analysis and accurate quantification of unintended large gene modifications induced by CRISPR-Cas9 gene editing
Source: PubMed Central journal article supplement (PMC9586483; doi:10.1126/sciadv.abo7676), 2022-10-21
Supplement: sciadv.abo7676_sm.pdf [file sciadv.abo7676_sm.pdf]

Supplementary Materials for  
**Comprehensive analysis and accurate quantification of unintended large gene  
modifications induced by CRISPR-Cas9 gene editing**

So Hyun Park *et al.*

Corresponding author: Gang Bao, gang.bao@rice.edu

*Sci. Adv.* **8**, eabo7676 (2022)  
DOI: 10.1126/sciadv.abo7676

**This PDF file includes:**

Tables S1 to S7  
Figs. S1 to S39

## Supplementary Information

### Supplementary Tables

**Supplementary Table S1.** List of gRNAs. R-66S and R-02 gRNAs target the first exon of *HBB* with varying proximity to the SCD mutation site. SD-02 gRNA introduces 13-nt HPFH deletion at high frequency in the *HBG1* and *HBG2* promoters for the reactivation of HbF. *BCL11A* gRNA targets the GATA1 binding site at the *BCL11A* erythroid enhancer for the reduction of *BCL11A* expression and induction of HbF.

| gRNA   | Target | gRNA sequence (PAM)             | References                       |
|--------|--------|---------------------------------|----------------------------------|
| R-66S  | HBB    | <b>GTAACGGCAGACTTCTCCACAGG</b>  | Park (7)                         |
| R-02   | HBB    | <b>CTTGCCCCACAGGGCAGTAACGG</b>  | Hoban (6), DeWitt (5), Dever (4) |
| SD-02  | HBG    | <b>CTTGTC AAGGCTATTGGTCAAGG</b> | Humbert (27)                     |
| BCL11A | BCL11A | <b>CTAACAGTTGCTTTTATCACAGG</b>  | Wu (28)                          |

**Supplementary Table S2.** Identification of colony genotype after *HBB* gene-editing in S-HUDEP2 by S-R NGS, L-R NGS with gel shift assay and ddPCR.

**Supplementary Table S3.** Identification of colony genotype after R-66S RNP delivery in SCD HSPCs by S-R NGS, L-R NGS with gel shift assay and ddPCR.

**Supplementary Table S4.** Identification of colony genotype after R-66S RNP and ssODN delivery in SCD HSPCs by S-R NGS, L-R NGS with gel shift assay and ddPCR.

**Supplementary Table S5.** List of primer sequences

**Supplementary Table S6.** Details of large insertions in SCD HSPCs treated by R-66S RNP

**Supplementary Table S7.** LongAmp-seq sequencing depth and read numbers

## Supplementary Figures

### Figure S1

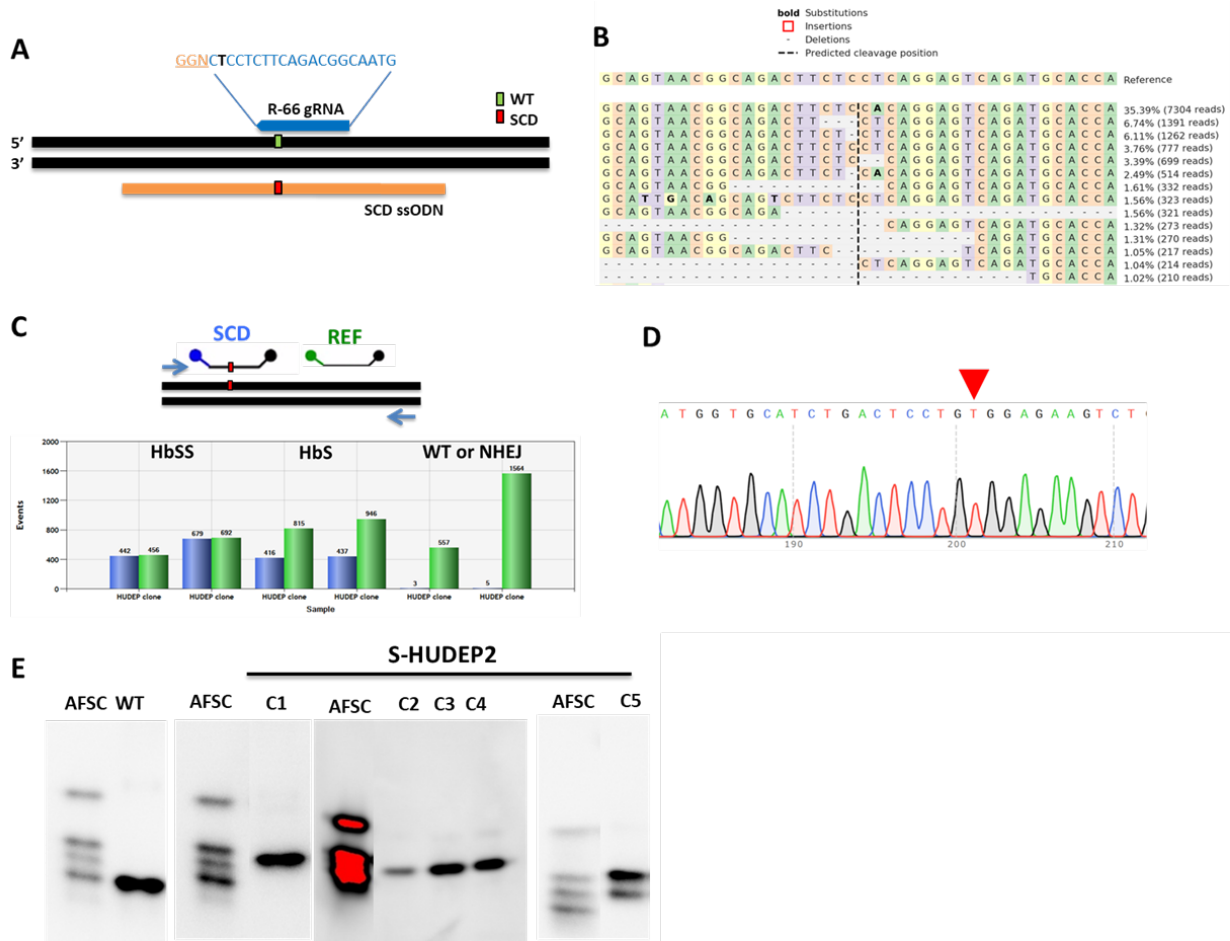

**Figure S1. Generation of S-HUDEP2 cell model.** (A) Schematic of gRNA and ssODN design near the SCD locus (with the green or red box showing the location of sickle mutation). High-Fidelity (HiFi) *SpCas9* and WT *HBB*-targeting R-66 gRNA as RNP was delivered along with ssODN to introduce the sickle mutation into WT HUDEP2. The R-66 gRNA sequence is shown in blue (with the WT base T in black), and the PAM sequence is shown in orange and underlined. The SCD ssODN (shown in orange with the SCD mutation in red) is symmetric with respect to the R-66 cut site and complementary to the gRNA non-target strand. (B) Visualization of the frequent allele changes (>1%) around the Cas9 cut site in HiFi *SpCas9*/R-66 gRNA and SCD ssODN treated WT HUDEP2. Substitutions are shown in bold font. Inserted sequences are highlighted with red rectangles, and deletions are indicated as horizontal dashed lines. A vertical dashed line indicates the predicted cleavage position of R-66 gRNA. Deep sequencing data were analyzed by CRISPResso2 (30). (C) Design of probe-based ddPCR assay and representative ddPCR event counts for different clonal genotypes. The probe-based ddPCR assay consists of a primer pair and three probes, a *HEX* reference (REF) probe binding distant from the target site but still within the amplicon, and a FAM SCD probe binding to modified sickle alleles (GtG). Droplets containing signals from both REF and SCD probes represent sickle alleles, and droplets containing only the REF probe signal represent WT or NHEJ allele. Homozygous SCD clones have the same number of HEX and FAM events. (D) Sanger sequencing chromatogram of the S-HUDEP2 clone. The SCD mutation is indicated with a red arrow. (E) Representative hemoglobin

native PAGE gel and HPLC showing HbA production in WT HUDEP2 and HbS production in S-HUDEP2 clones. S-HUDEP2 clones with exclusive HbS production. Hemoglobin AFSC control contains mix of HbA, HbF, HbS and HbC (bottom-up).

**Figure S2**

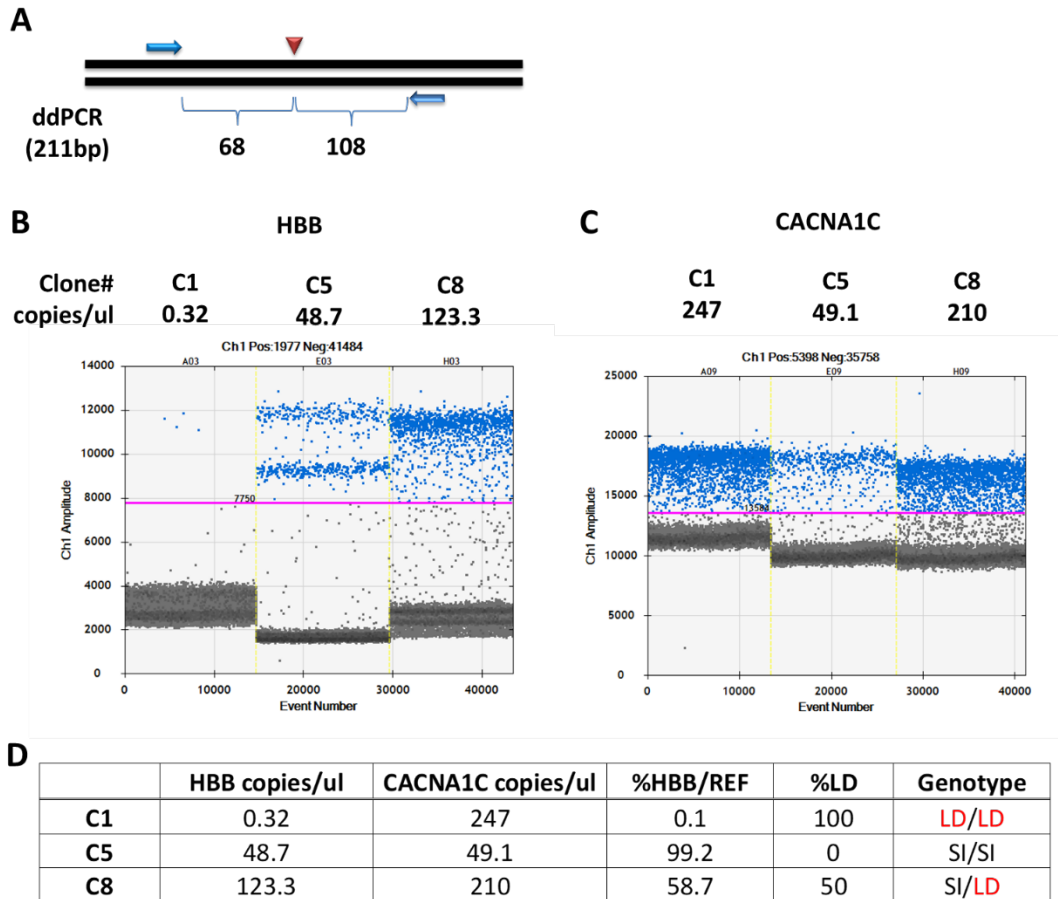

**Figure S2. Design and validation of ddPCR assay for the quantification of the *HBB* copy number.** The EvaGreen-based ddPCR *HBB* copy number assay consists of two separate PCR reactions: a primer pair targeting *HBB* on chr11 and a primer pair targeting reference gene on chr12. Alleles containing large deletions or chromosomal rearrangements that remove primer binding site/s cannot produce *HBB* signals. Therefore, we checked the copy number of *HBB* relative to a reference gene (*CACNA1C*). **(A)** An *HBB* forward primer binds 68bp upstream of the cut-site, and a reverse primer binds 100bp downstream of the cut-site. **(B)** ddPCR amplitude plot for 3 representative clones showing droplets containing signals from *HBB* amplification. **(C)** ddPCR amplitude plot for 3 representative clones showing droplets containing signals from *CACNA1C* amplification. **(D)** The copy number of *HBB* was normalized by the copy number of *CACNA1C* to figure out the number of alleles (0, 1 or 2) carrying large deletion (LD) in each clone. For clone 1, the absence of the *HBB* copy number indicates two LD alleles. For clone 5, 100% of *HBB* copy number indicates the absence of LD. For clone 8, a 50% *HBB* copy number indicates one LD and one small INDEL (SI).



**Figure S3**

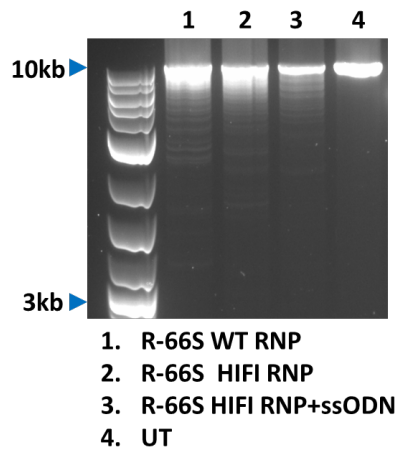

**Figure S3. Size-shifted bands in 10kb L-R PCR.** Alleles containing LD generate smaller long-range PCR (L-R PCR) products as shown in size shifted bands in 1. R-66S WT-Cas9 RNP, 2. R-66S HiFi-Cas9 RNP and 3. R-66S HiFi-Cas9 RNP + ssODN treated samples, compared to 4. Untreated.

**Figure S4**

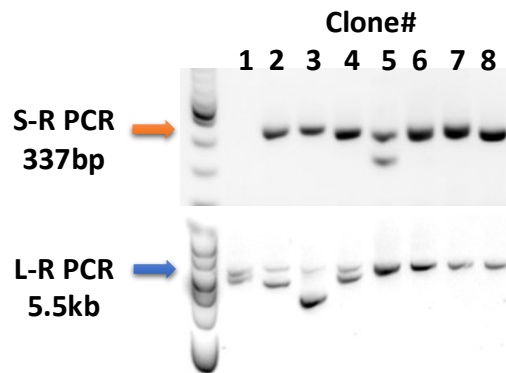

**Figure S4. Agarose gel image showing the S-R PCR and L-R PCR bands of 8 representative single-cell clones.** The short-range PCR (S-R PCR) amplify the 300 bp region spanning the cut-site, and alleles containing LD would fail to generate PCR product. The L-R PCR amplify the 5.5 kb region spanning the cut-site, and alleles containing a LD within the long-range PCR primer binding sites generate smaller PCR products.

**Figure S5**

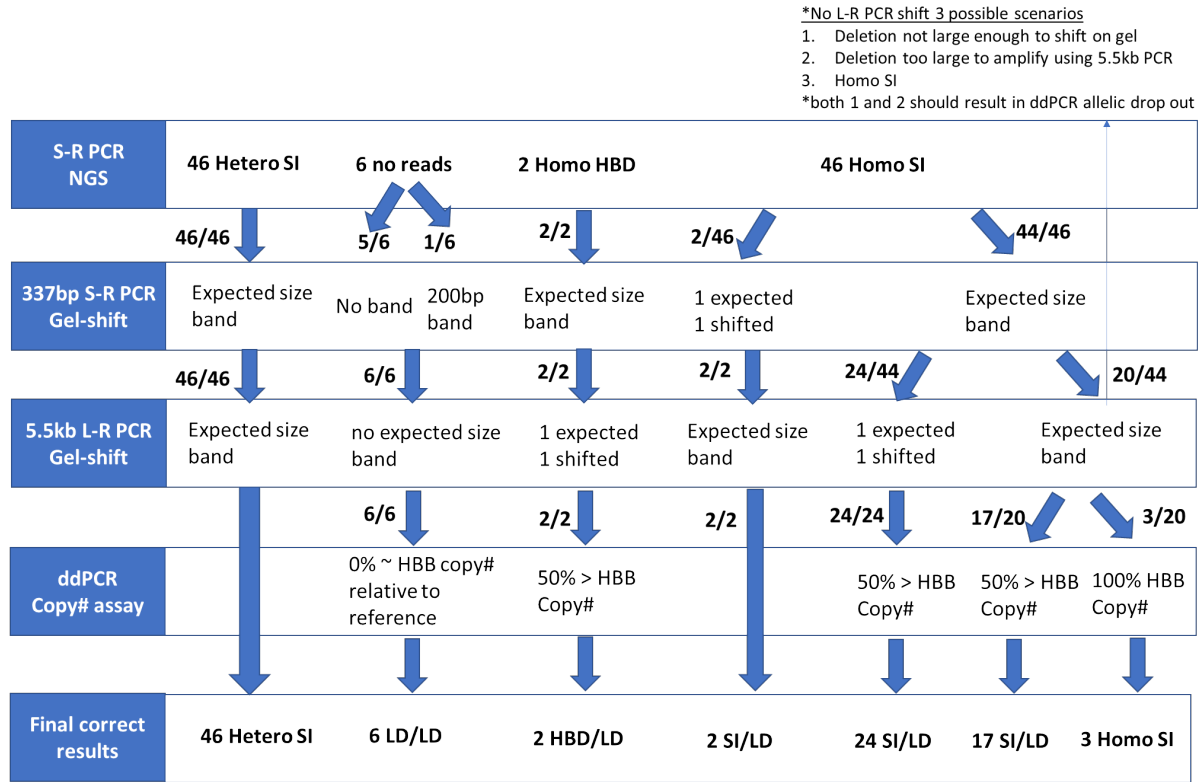

**Figure S5.** The schematic showing how the colony genotype was determined based on NGS, L-R PCR gel shift, and ddPCR copy number assay.

**Figure S6**

SI=Small INDEL  
 LD=Large Deletion

| Clone# | Genotype |
|--------|----------|
| 1      | LD/LD    |
| 2      | SI/LD    |
| 3      | SI/LD    |
| 4      | SI/LD    |
| 5      | SI/SI    |
| 6      | SI/SI    |
| 7      | SI/SI    |
| 8      | SI/LD    |

**Figure S6.** Three assays determined the clonal genotype of 8 clones shown in Fig. S4. For clone 1, the absence of S-R PCR band and two size-shifted L-R PCR bands suggest LD/LD genotype. For clones 2-4, one expected sized band and one downward shifted L-R band suggests SI/LD genotype. Although clone 8 does not have a size-shifted L-R PCR band, this clone has SI/LD genotype based on the ddPCR allelic drop-off assay.

**Figure S7**

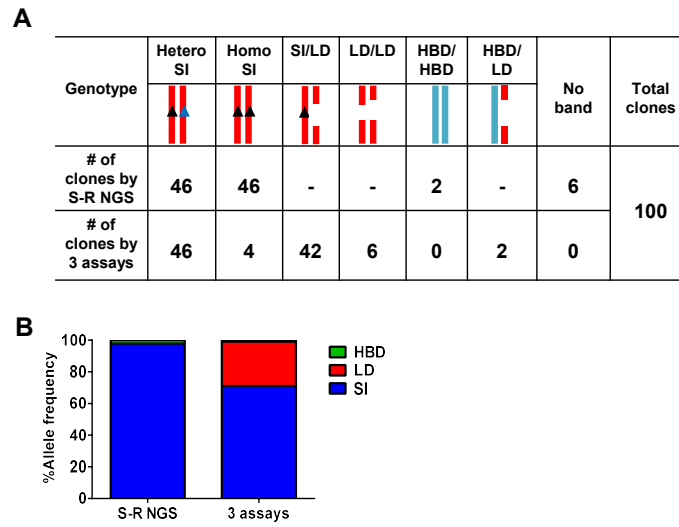

**Figure S7. The comparison of genotype results obtained using S-R NGS and combination of three assays respectively for 100 single-cell clones from R-66S RNP treated S-HUDEP2 cells.** The genotype of each single-cell clone was identified by S-R NGS and two additional complementary detection methods to account for the drop-out of large deletion alleles: Long-Range (L-R) PCR followed by gel shift assay and ddPCR-based *HBB* copy number quantification. **(A)** With S-R NGS, 46 clones were found to have heterozygous small INDEL (SI) and 46 clones with homozygous SI (**Supplementary Table S2**). We previously showed that Cas9 cutting induced DNA double-strand breaks (DSB) in *HBB* could be repaired using the homologous sequences from the  $\delta$ -globin gene (*HBD*) as an endogenous template, resulting in SCD mutation correction. We found that two clones had homozygous SCD mutation correction mediated by *HBD* gene conversion, and six clones failed to amplify S-R PCR products. As expected, no genotype with large deletion (LD) could be identified by S-R PCR. In contrast, the combination of three assays (S-R NGS, L-R PCR and ddPCR) gave different genotypes of the single-cell clones: out of the 46 clones identified as homozygous SI genotype by S-R NGS, only 4 clones were indeed homozygous SI while 42 clones carried LD. We found that the six clones that failed to amplify S-R PCR product all had LD/LD genotype, and the two clones with *HBD* conversion had LD. As shown in **(A)**, 28% large deletion alleles (i.e., 56 alleles) occurred in 50% of clones (50 clones), which is consistent with the Hardy-Weinberg predictions (48%). Therefore, the use of S-R NGS significantly overestimated the percentage of SI alleles (97.8%) compared with that identified using the combination of three assays (71%). More significantly, our results showed that 50% of the single-cell clones had LD in at least one allele, which caused a significant reduction of *HBB* copy numbers in gene-edited S-HUDEP2 cells as quantified by ddPCR. **(B)** S-R NGS significantly overestimated the percentage of SI alleles; 97.8% SI and 2.1% *HBD* alleles were incorrectly identified by S-R NGS compared to 71% SI, 28% LD, and 1% *HBD* alleles identified by the combination of three assays.

**Figure S8**

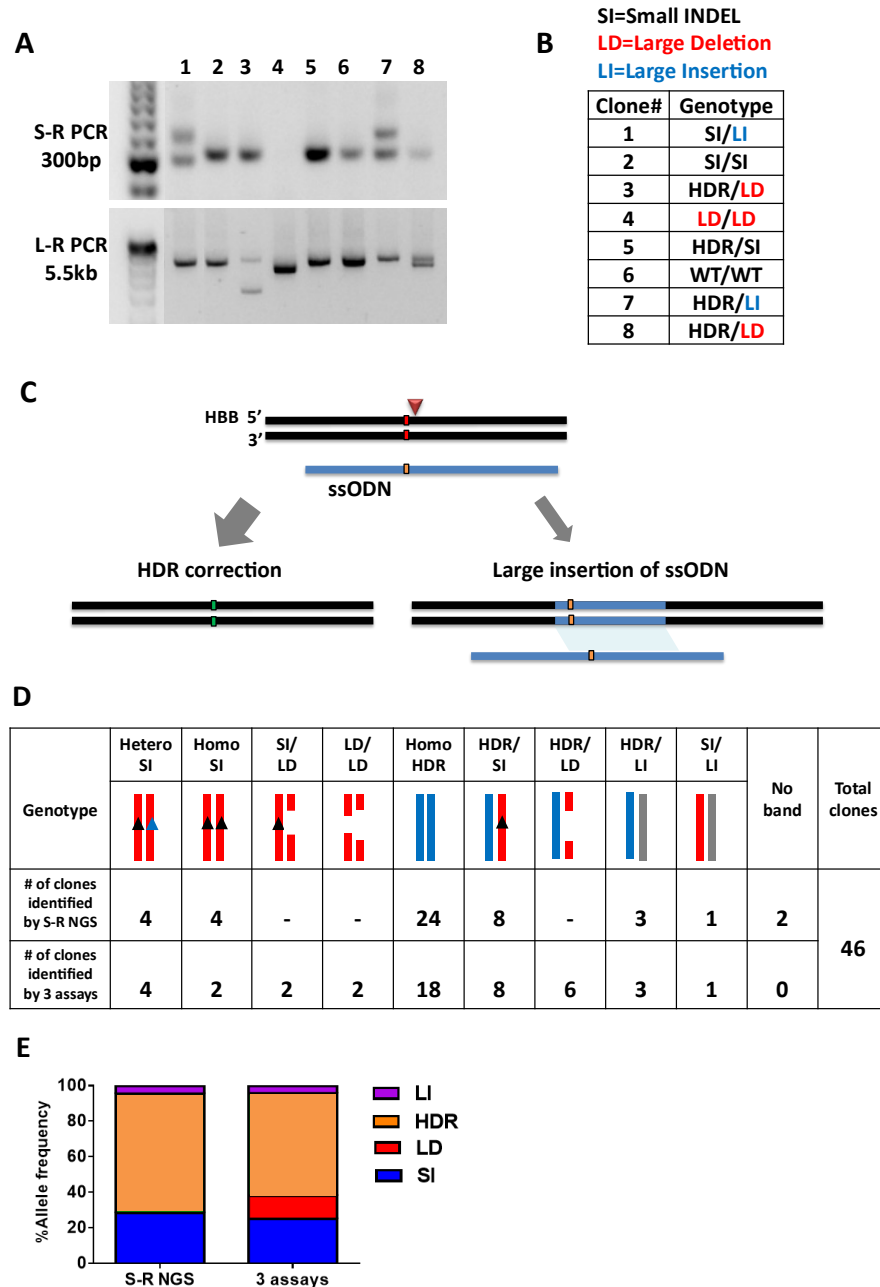

**Figure S8. Clonal genotypes of R-66S RNP and corrective ssODN donor treated S-HUDEP2.**

S-HUDEP2 treated with R-66S HiFi RNP and corrective ssODN was assayed as single cell clones using Illumina short-read sequencing (NGS), L-R PCR, and ddPCR copy number assays for clonal genotypes. (A) Representative agarose gel image showing the S-R PCR and L-R PCR products of 8 clones. Clone 1 contains a combination of an upward size-shifted and a downward size-shifted banding pattern, suggesting an approximately 100bp large insertion and a small INDEL (LI/SI genotype). Although the insertion allele was amplified by S-R PCR, the NGS analysis failed to detect this particular allele, providing a genotype of near 100% 26bp deletion. In order to capture this large insertion, the alignment threshold was reduced from >80% to >70%. NGS analysis under the adjusted alignment conditions indicated 35% of reads corresponded to a

66 bp insertion and the remaining 65% of reads the previously detected -26 bp deletion. While this clonal genotype of heterozygotes should yield a 50/50 representation of each allele, the +66 bp/-26 bp size differences between these alleles create a significant PCR bias towards smaller amplicons. The insertion alleles for clone 7 were similarly lost during the standard alignment step and regained upon reducing the reference alignment threshold. This clone was then genotyped at 45% large insertion (+90 bp) to 55% HDR (LI/HDR genotype). For clone 4, the absence of S-R PCR band and size-shifted L-R PCR bands suggest two large deletion events (LD/LD genotype). (B) Table of genotype for 8 clones based on (A). (C) Out of 8 clones carrying large insertion, 7 clones harbor partial ssODN insertion, suggesting incorporation of ssODN at the DSBs instead of HDR-mediated precise SCD mutation correction. (D) The combination of three assays showed the correct genotype results: out of 24 clones previously identified as homozygous HDR genotype by S-R NGS, 18 clones were homozygous HDR while 8 clones carried large deletion. Two clones that failed to amplify S-R PCR products have LD/LD genotype. Two clones with homozygous SI during S-R PCR were, in fact, carriers for large deletion. (E) 64% HDR incorrectly identified by S-R NGS compared to 54% HDR alleles identified by three assays.

**Figure S9**

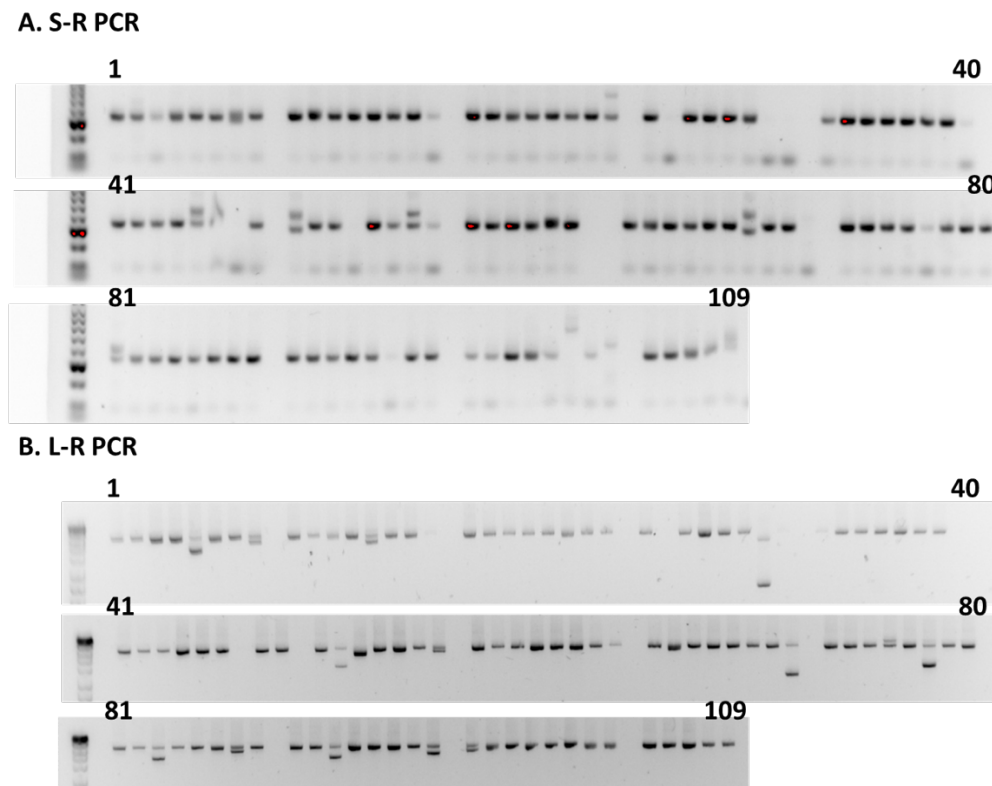

**Figure S9. R-66S RNP and ssODN treated S-HUDEP2 clonal genotype gel images. (A)** 300 bp S-R PCR amplicons from 109 clones. **(B)** 5.5kb L-R PCR amplicons from 109 clones.

**Figure S10**

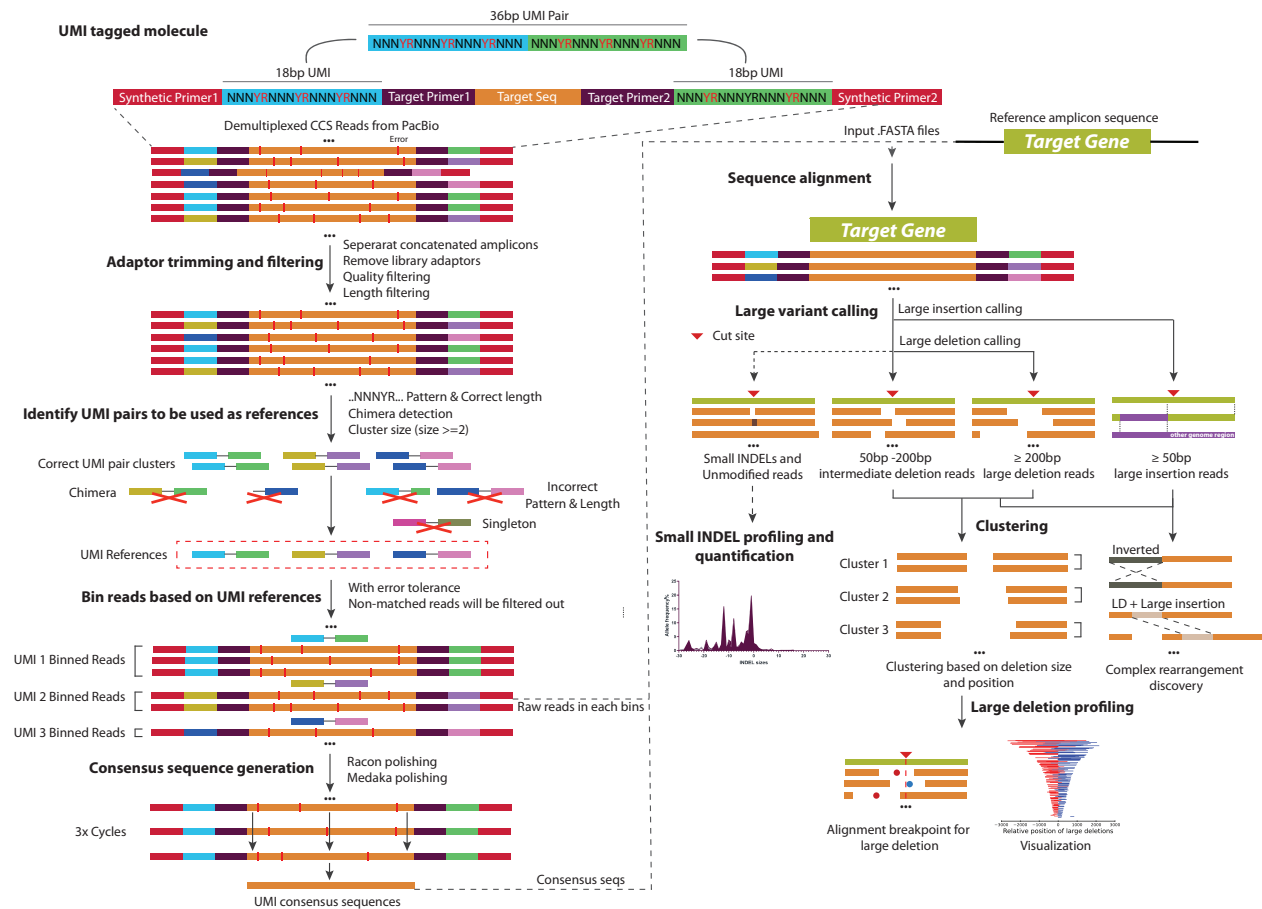

**Figure S10. Schematics of SMRT-seq with UMI data processing.** (A) longread\_umi pipeline (26). The demultiplexed HiFi CCS reads from SMRT-seq were trimmed and filtered with quality control ( $\leq 15\%$  expected error) and length control. UMI pairs were extracted and filtered based on the designated UMI pattern (NNNYRNNNYRNNNYRNNN) and length (=18 bp) for each UMI. Identical and highly matched (with some tolerance for UMI PCR/sequencing error) UMI pairs were clustered, and CCS reads with one UMI (singleton) were discarded. Raw CCS reads were binned together based on alignment with each clustered UMI pair. After binning, UMI consensus sequences were generated with Racon polishing and Medaka polishing. (B) Large variants caller pipeline (LV\_caller). UMI consensus sequences were taken as the input data set, and the sequence of the target gene (e.g. *HBB*) was taken as the reference sequence (all the file formats are in fasta). Minimap2 was used to align UMI consensus sequences to the reference sequence. The UMI consensus sequences were then categorized into four groups: (i) Unmodified alleles and those with small INDELS, (ii) intermediate deletions of 50-200 bp, (iii) LDs of  $\geq 200$  bp, and (iv) large insertions of  $\geq 50$  bp (including those simultaneously have intermediate deletions or large deletions). Small INDELS were profiled with INDEL size and allele frequency distribution; large deletions were profiled based on their alignment breakpoint and complex local rearrangements; large insertions were aligned against hg19 using BLAT and annotated chromosome mapping. To further profile deletions patterns, large deletions with similar sizes ( $\pm 10$  bp) and starting positions ( $\pm 10$  bp) were clustered.

**Figure S11**

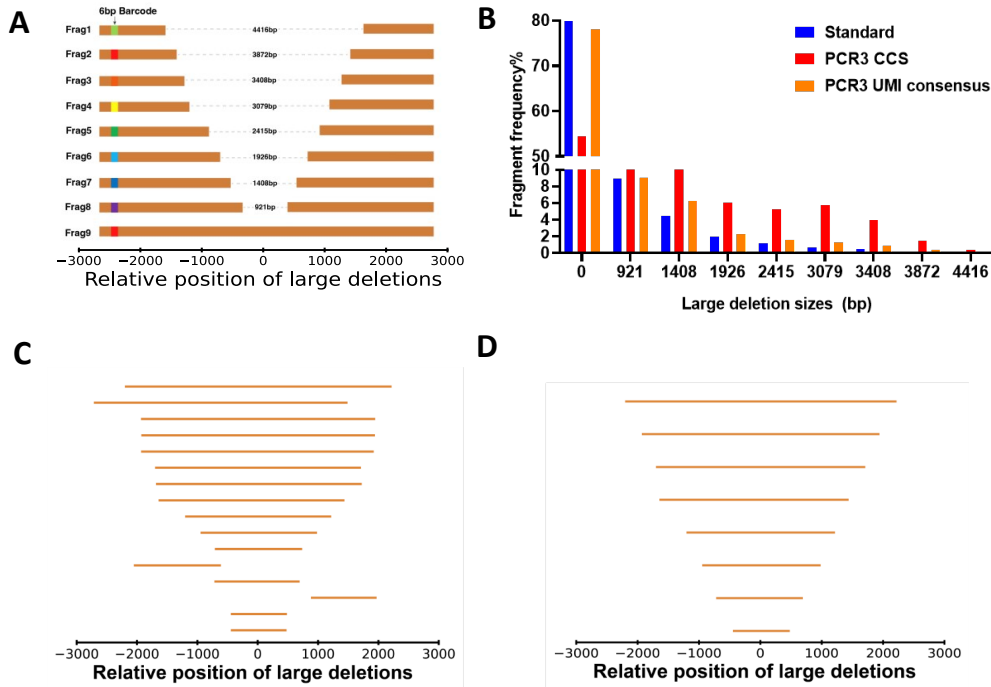

**Figure S11. Benchmark the SMRT-seq with UMI using known mixtures of allelic variants.**

(A) We constructed a synthetic DNA standard consisting of a wildtype *HBB* sequence of 5490 bp (Template 9) and Templates 1-8 with artificial LDs of 8 different sizes (4416 bp, 3872 bp, 3408 bp, 3079 bp, 2415 bp, 1926 bp, 1408 bp and 921 bp, respectively). Each DNA template was assigned a 6 bp allele-specific barcode at the 5' end to verify the accuracy of LD variant calling. The nine plasmid templates were linearized and pooled with specific molar ratios, with 80% Template 9 and 20% of Templates 1-8 combined. (B) The relative percentages of Templates 1-9 in the pooled plasmid standard were quantified by duplex probe-based ddPCR using barcode-specific primers and reference primers. The synthetic DNA library was then used as the standard for a 3-step L-R PCR to generate UMI-tagged and barcoded PCR3 products, sequenced using SMRT-seq to quantify the percentages of Templates 1-9. Based on the aligned CCS reads, Template 9 in PCR3 product was 54.38%, significantly decreased from 79.9% quantified by ddPCR in the original sample as standard, largely due to PCR errors. (C) Using the aligned CCS reads, LDs of the same start position and size were clustered together to identify unique LD patterns, and each large deletion pattern was mapped relative to the Cas9 cut-site. The CCS reads contain false-positive LDs different from that in Templates 1-8. (D) LDs identified using UMI consensus reads were mapped relative to the Cas9 cut-site. Only Templates 1-8 were identified, demonstrating SMRT-seq with UMI can accurately quantify LDs without false positives.

Figure S12

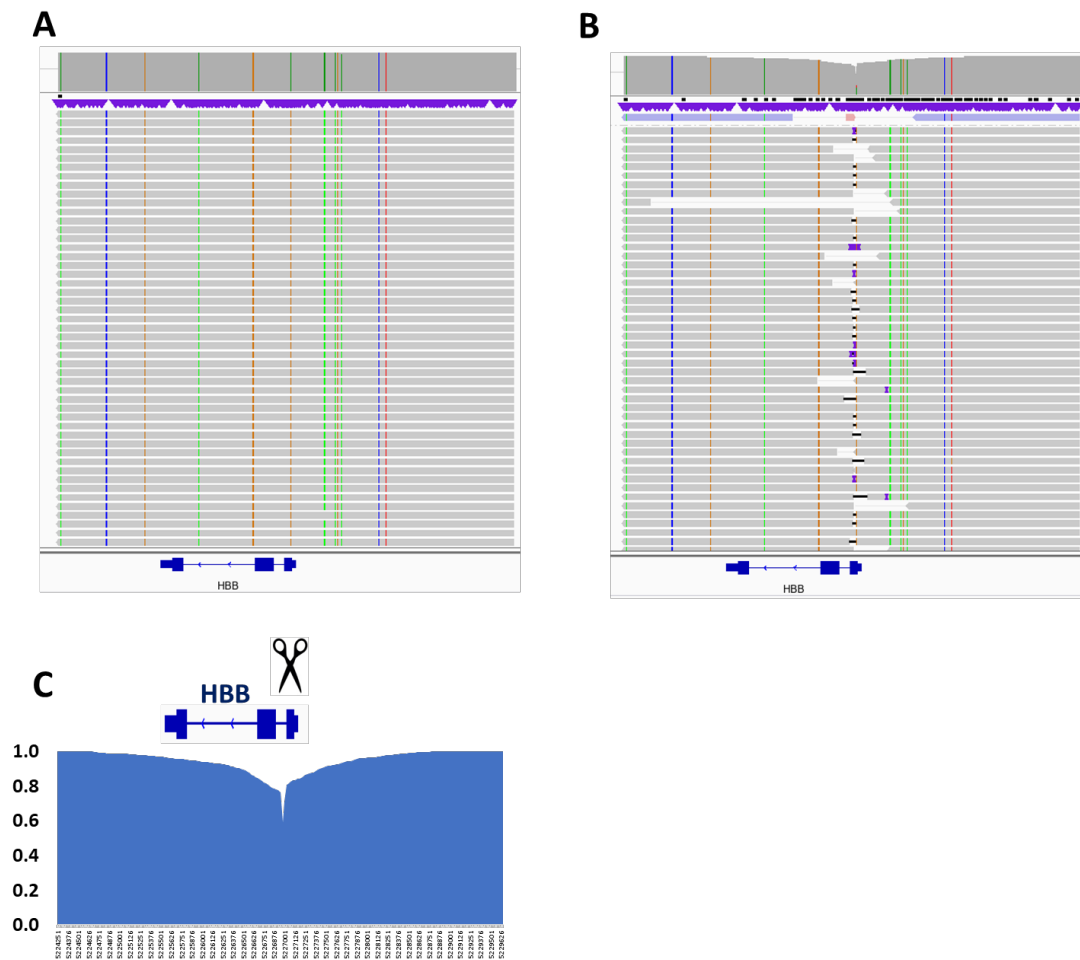

**Figure S12. SMRT-seq UMI consensus read alignment.** IGV alignment of UMI consensus reads to *HBB* for (A) untreated, and (B) R-66S RNP treated SCD HSPCs from Donor#1 showing read coverage depletion pattern around the R-66S cut site only in RNP sample from reads containing small INDELs and LDs. Vertical colored lines indicate SCD mutation, and 11 additional common SNPs found within the amplicon in the individual patient donor compared to the reference genome. (C) The read coverage depletion pattern of the RNP-treated SCD HSPCs, normalized by that of the untreated sample showing asymmetric pattern.



**Figure S13**

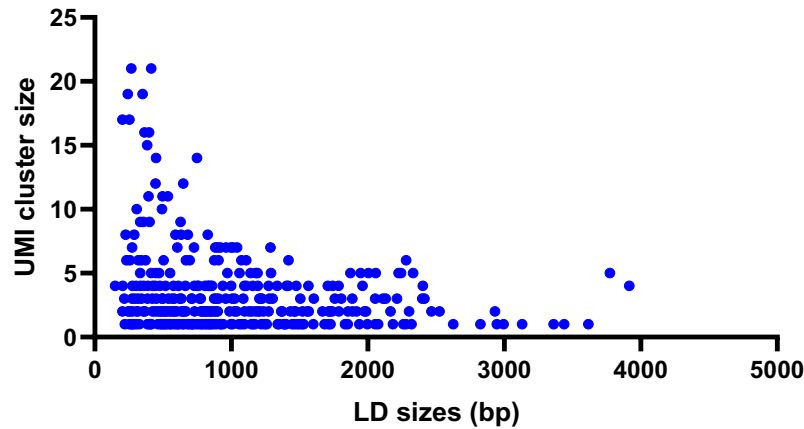

**Figure S13. UMI cluster size for each LD pattern.** In R-66S RNP treated SCD HSPC from Donor#1, we found 35.4% of LDs ( $\geq 200$  bp). From 3473 UMI consensus sequences, we identified 1229 LD-containing sequences that form 381 unique LD patterns, demonstrating a diverse range of LDs. Of the 381 unique LD patterns, 130 were captured by one UMI consensus sequence, 90 by two UMI consensus sequences, 46 by three UMI consensus sequences, *etc.* Note that 21 UMI consensus sequences have the LD of the same size (267bp) and start position, accounting for 0.6% of the total UMI consensus sequences.

**Figure S14**

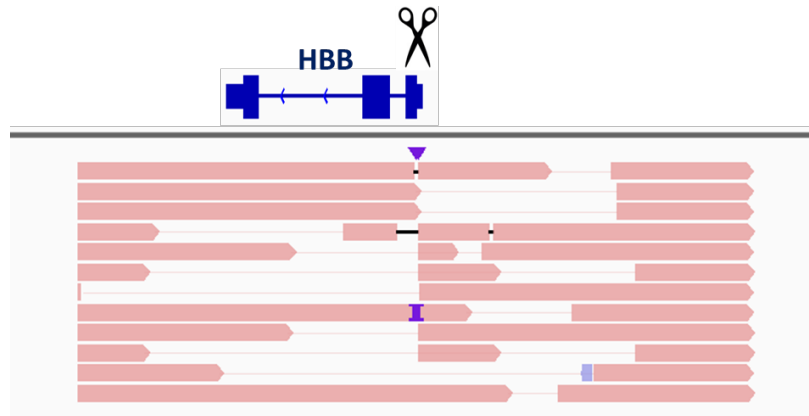

**Figure S14. SMRT-seq identified different types of LD.** An example of read alignment to *HBB* showing different types of LDs including asymmetric LDs spanning the cut-site, LDs away from the cut-site, and multiple LDs on the same allele. Integrative Genomics Viewer (IGV) was used for the visual exploration of genomic data.

**Figure S15**

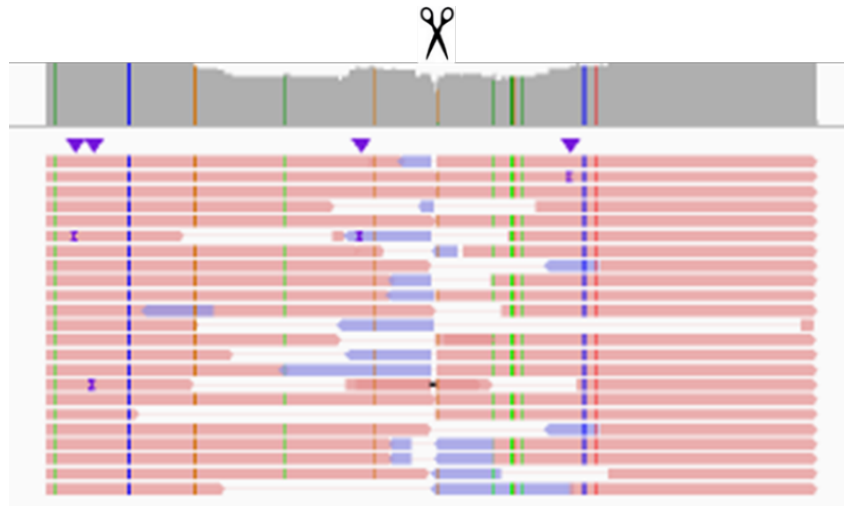

**Figure S15. SMRT-seq identified different types of local complex rearrangements.** IGV visualization of aligned of UMI consensus sequences containing large insertions ( $\geq 50$  bp) at the on-target cut-site. Some of the insertions were accompanied by small INDELs, intermediate deletions or LDs. Most of the inserted sequences mapped to sequences within the *HBB* near the cut-site, demonstrating local complex chromosomal rearrangements. The rest of the inserted sequences are mapped to the other chromosomal location in the human genome (hg19).

**Figure S16**

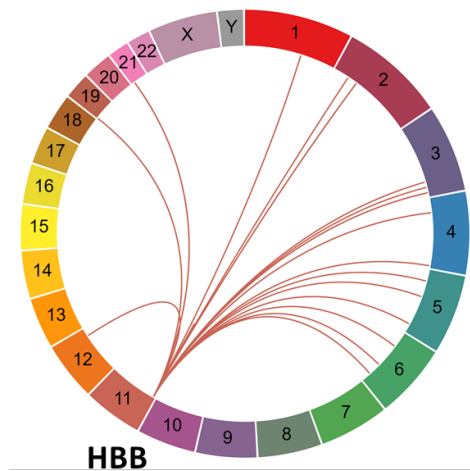

**Figure S16. Circos plot showing insertion donating site on Hg19 in R-66S RNP treated SCD HSPCs.** About 66% of the inserted sequences are homologous to those at or close to the *HBB* cut-site, demonstrating local complex chromosomal rearrangements within the  $\beta$ -globin locus. The rest of the inserted sequences are mapped to the other chromosomal locations in the human genome without known association with the sequence at the on-target cut-site.

Figure S17

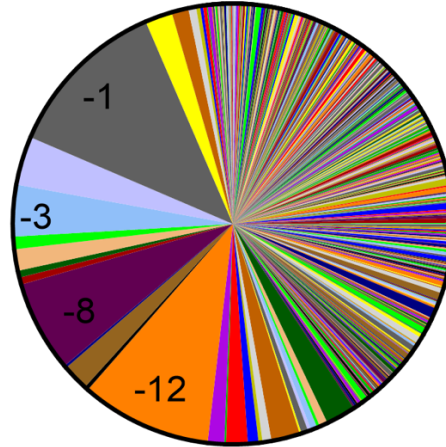

**Figure S17. Pieplot showing broad spectrum of gene-editing outcomes.** Of the 3478 UMI consensus sequences, a total of 536 unique mutations were identified, including 67 small INDELs, 44 intermediate deletions, 381 LDs, and 44 large insertions. The SMRT-seq identified allelic diversity, including large modifications (536 unique gene modification patterns), is >8-fold higher than characterized based on small INDELs (67 small INDEL patterns).

Figure S18

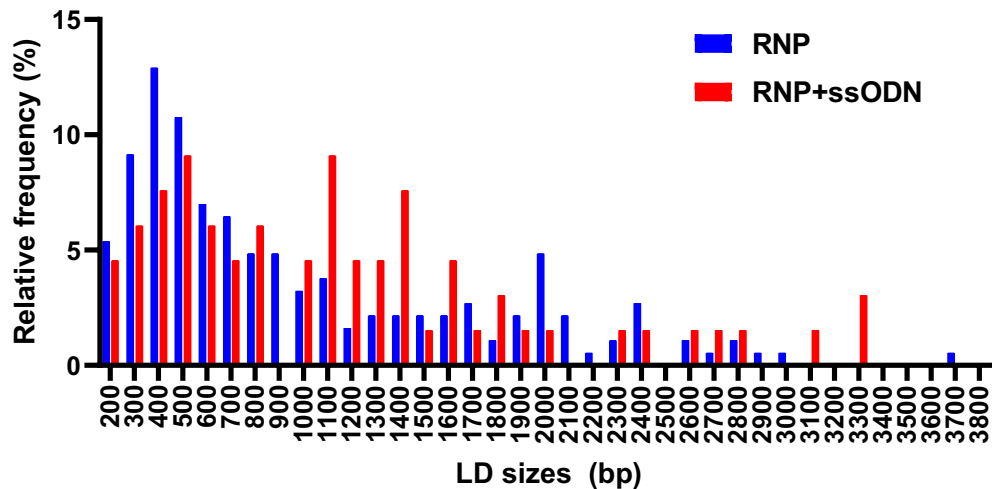

**Figure S18. Relative LD frequency in RNP compared to RNP and ssODN treated SCD HSPCs.** In the presence of ssODN, the size of LD distribution is skewed, with lower rates for shorter LDs and higher rates for longer LDs.

Figure S19

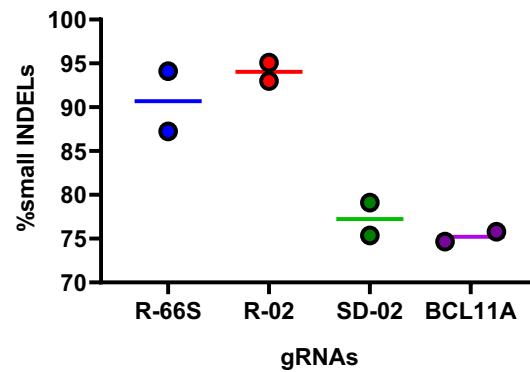

**Figure S19. High level of on-target small INDELS measured by S-R NGS.** R-66S, R-02, SD-02 and BCL11A gRNAs were complexed with HiFi SpCas9 and delivered as RNP to SCD HSPCs from Donor #1. All gRNAs showed high on-target small INDEL rates measured by S-R NGS, similar to that previously reported.

Figure S20

**A. R-66S**

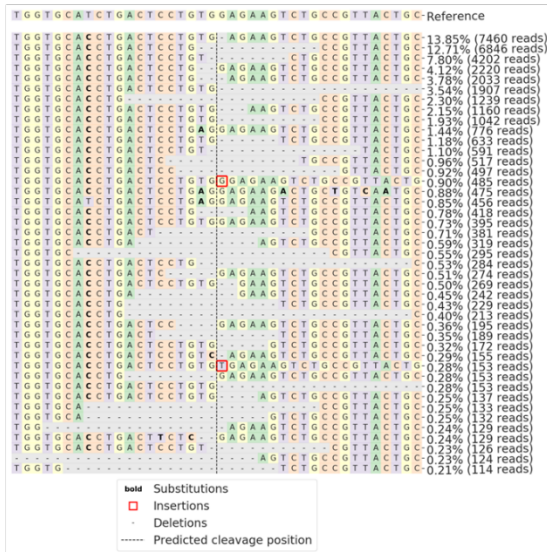

**B. R02**

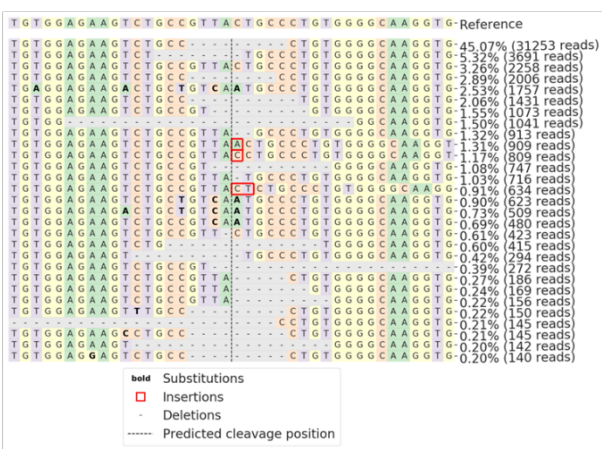

**C. SD02**

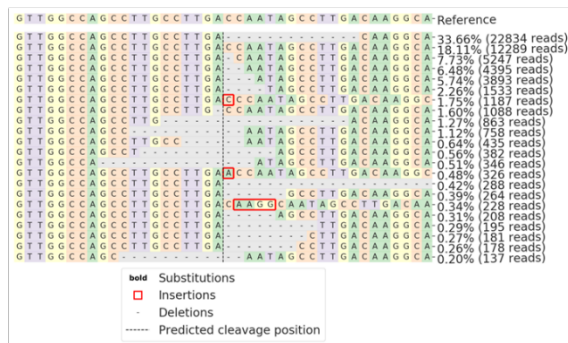

**D. BCL11A**

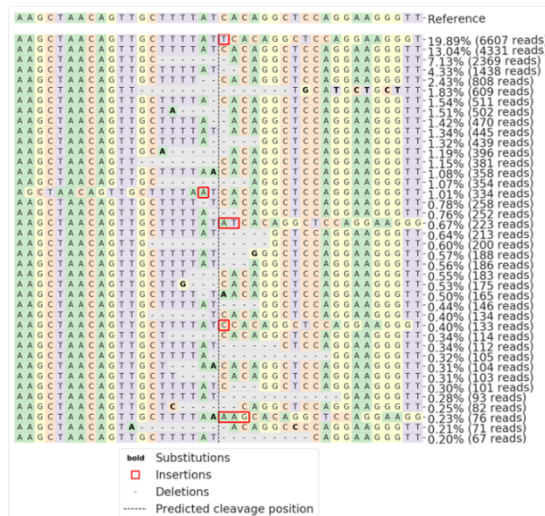

**Figure S20. Distribution of the most frequent allele modifications identified with CRISPResso2 around cleavage sites in SCD HSPCs.** (A) R-66S, (B) R-02, (C) SD-02 and (D) BCL11A gRNAs were complexed with HiFi SpCas9 and delivered as RNP to SCD HSPCs from Donor #1. All distributions showed high rates of on-target small INDELS profile by S-R NGS as previously reported.

Figure S21

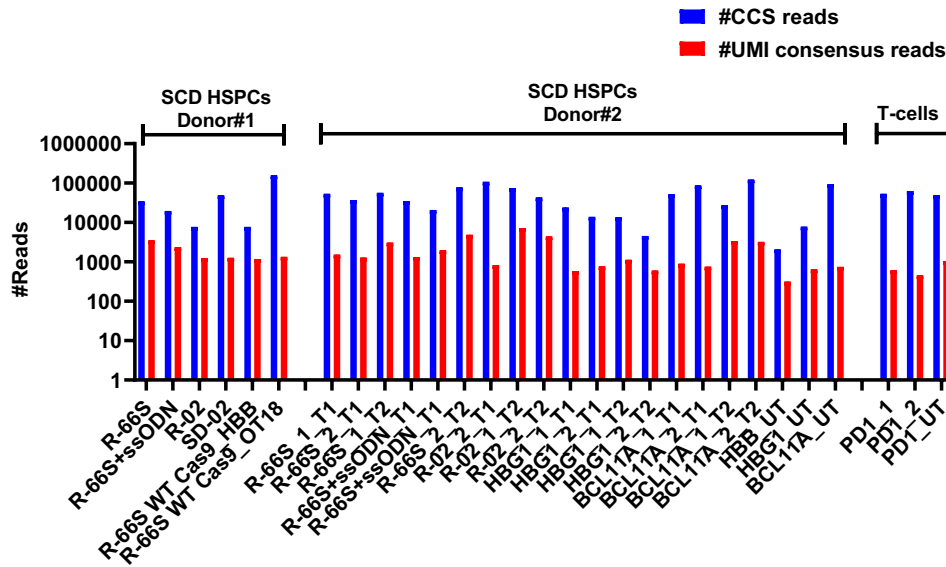

**Figure S21. SMRT-seq with UMI read number after UMI processing.** Number of Q20 CCS reads and UMI consensus sequences aligned to the reference for each sample. Samples from SCD HSPCs Donor#1 edited with R-66S±ssODN and R-02 at *HBB*, SD-02 at *HBG1* and R-66S gRNA complexed with WT Cas9 (R-66S WT Cas9) at *HBB* and *OT18*. SCD HSPCs Donor#2 edited with R-66S±ssODN, R-02, SD-02, BCL11A and analyzed on day-4 post-delivery (T1), and after 14 days erythroid differentiation (on day-17 post-delivery) (T2). T-cells edited with PD-1.

Figure S22

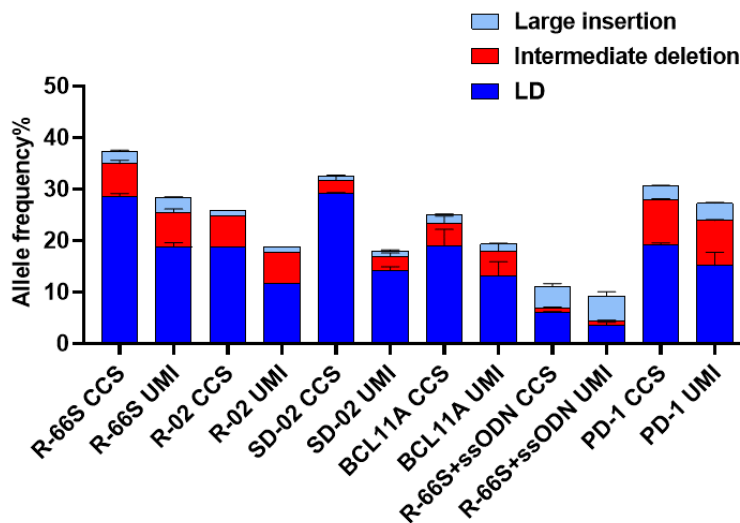

**Figure S22. Mitigation of PCR bias in UMI consensus reads.** We compared frequencies of LD, intermediate deletion, and large insertion quantified using UMI consensus reads compared to CCS reads and found that correction of PCR bias consistently led to decreased rates of LDs in SCD HSPCs from Donor#2 edited with R-66S, R-66S±ssODN, R-02, SD-02, BCL11A, and PD-1.

Figure S23

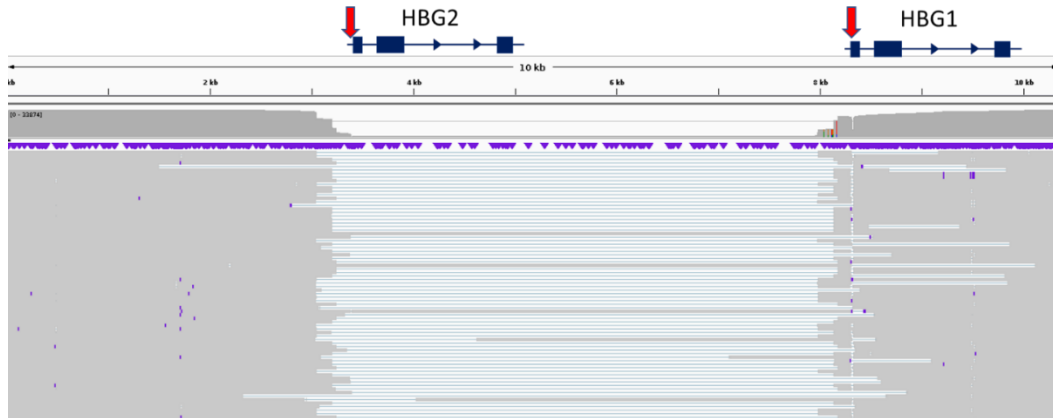

**Figure S23. Schematics of *HBG* locus.** Previously, considerable LD levels upon simultaneous cleavage have been reported removing the entire *HBG2* gene and part of the *HBG1* promoter creating *HBG-HBG2* fusion allele. *HBG1*-specific L-R PCR with 6.4 kb amplicon size could be misleading in the presence of another on-target cut site on *HBG2*, 4.9 kb upstream of the cut site on *HBG1*. To understand the types of large intergenic modification missed by *HBG1*-specific sequencing, we amplified and sequenced the 10 kbp region, including *HBG1* and *HBG2*. We observed intergenic LD extending further upstream of the cut site on *HBG2* and/or downstream of the cut site on *HBG1*, removing both *HBG1* and *HBG2*.

Figure S24

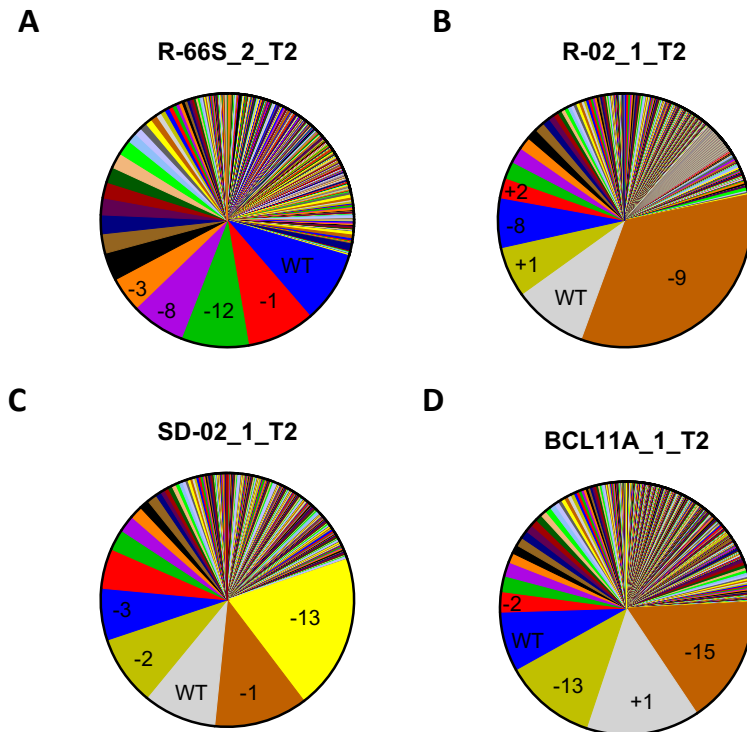



**Figure S24. Pieplot showing broad spectrum of gene-editing outcomes in SCD HSPCs from Donor #2.** The SMRT-seq results revealed a broad spectrum of unintended large modifications at or near the Cas9 cut-site in R-66S, R-02, SD-02 and BCL11A RNP treated SCD HSPCs. **(A)** In the R-66S\_2\_T2 sample, of the 4897 UMI consensus sequences, a total of 843 unique gene modification patterns were identified, including 86 small INDEL, 65 intermediate deletions, 567 LDs, and 125 large insertions. The SMRT-seq identified allelic diversity including large modifications (843 unique gene modification patterns) is >9.8-fold higher than characterized based on small INDELs (86 small INDEL patterns). **(B)** In the R-02\_1\_T2 sample, of the 7154 UMI consensus sequences, a total of 718 unique gene modification patterns were identified, including 83 small INDEL, 74 intermediate deletions, 495 LDs, and 86 large insertions. The SMRT-seq identified allelic diversity including large modifications (718 unique gene modification patterns) is >8.7-fold higher than characterized based on small INDELs (83 small INDEL patterns). **(C)** In the SD-02\_1\_T2 sample, of the 1130 UMI consensus sequences, a total of 236 unique gene modification patterns were identified, including 54 small INDEL, 18 intermediate deletions, 158 LDs, and 7 large insertions. The SMRT-seq identified allelic diversity including large modifications (236 unique gene modification patterns) is >4.4-fold higher than characterized based on small INDELs (54 small INDEL patterns). **(D)** In the BCL11A\_1\_T2 sample, of the 3375 UMI consensus sequences, a total of 528 unique gene modification patterns were identified, including 80 small INDEL, 49 intermediate deletions, 364 LDs, and 49 large insertions. The SMRT-seq identified allelic diversity including large modifications (528 unique gene modification patterns) is >6.6-fold higher than characterized based on small INDELs (80 small INDEL patterns).

**Figure S25**

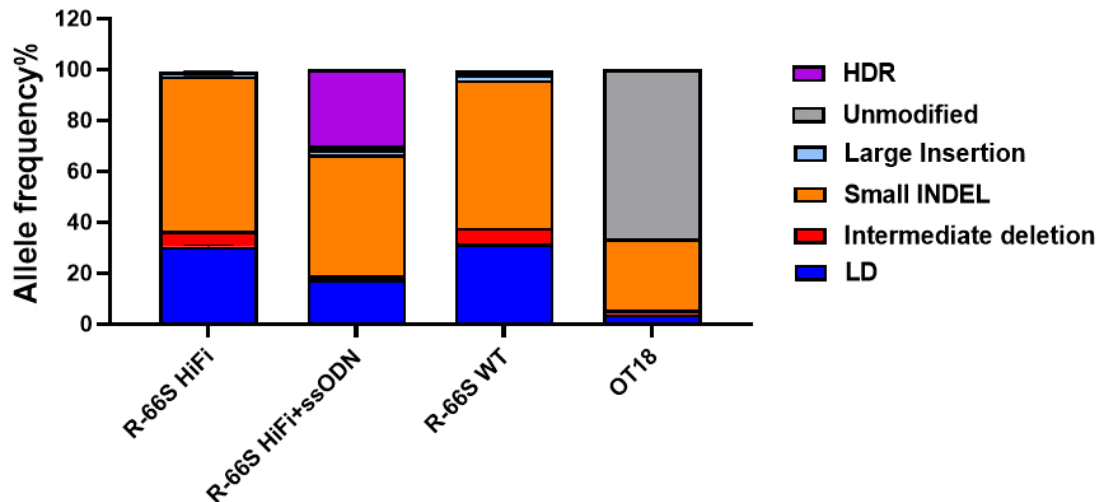

**Figure S25. Gene modifications induced by HiFi Cas9 and WT Cas9.** We delivered R-66S gRNA complexed with HiFi Cas9 and WT Cas9, respectively, into SCD HSPCs from Donor#1 and compared gene modification rates at the HBB on-target site as well as the known off-target site OT18. HiFi Cas9 and WT Cas9 treated samples showed similar LD rates (30.3% vs. 31.5%) and intermediate deletion rates (6.2 vs. 6.3%) quantified by SMRT-seq with UMI. WT Cas9 showed a higher rate of large insertion than HiFi Cas9 (2.2% vs. 1.6%). The LD rate at the OT18 in the WT Cas9 treated sample was 3.9%.



Figure S26

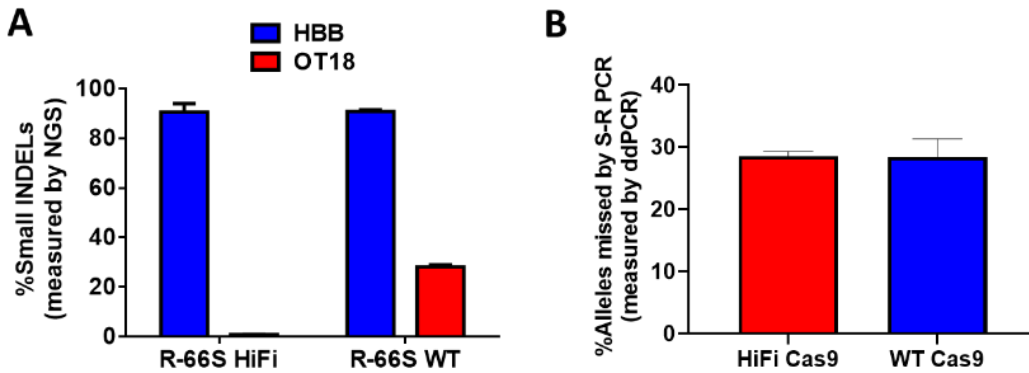

**Figure S26. Small INDELs and LDs induced by HiFi Cas9 and WT Cas9.** We delivered R-66S gRNA complexed with HiFi Cas9 or WT Cas9 and quantified the small INDELs by S-R NGS and LD by ddPCR. **(A)** The HiFi Cas9 gave similar small INDELs rates compared with WT Cas9 at *HBB*, but significantly reduced the small INDELs rates at the most active off-target site (OT18). **(B)** HiFi Cas9 and WT Cas9 treated samples showed similar LD frequencies at *HBB* measured by ddPCR allelic drop-off assay similar to reported by SMRT-seq with UMI in **Figure S26**.

Figure S27

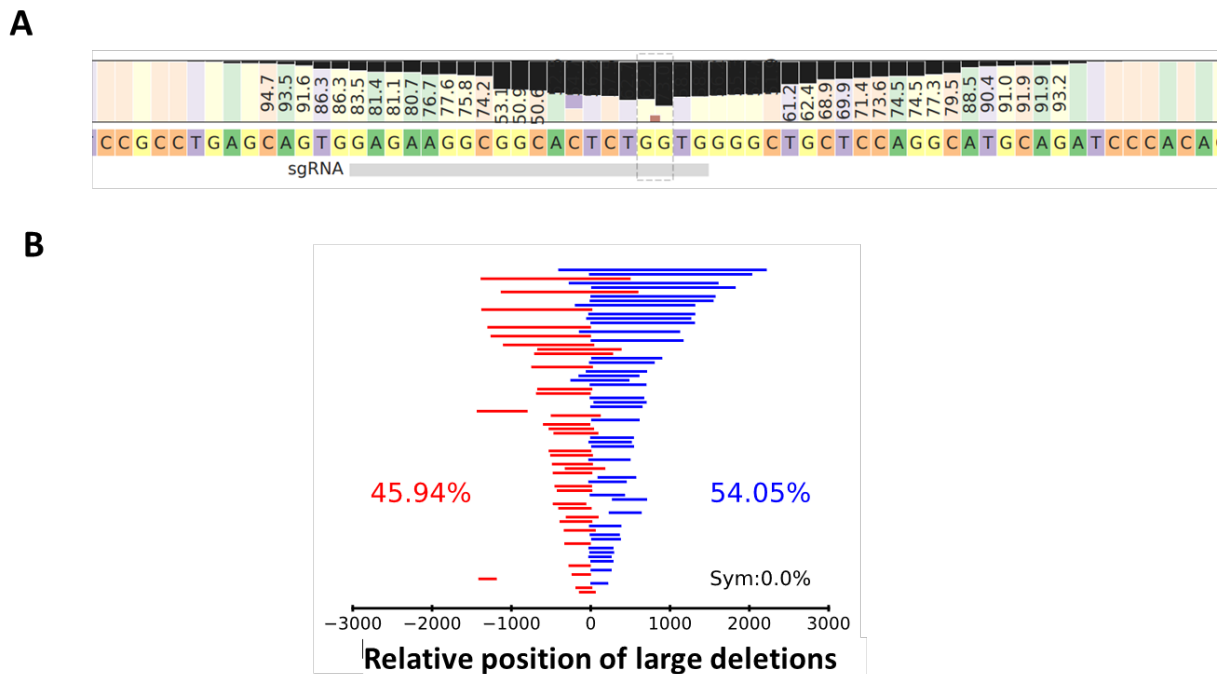

**Figure S27. Large deletions in PD-1 targeted primary T-cells.** We performed SMRT-seq with UMI for the gRNA targeting a PD-1 locus in T cells **(A)** Nucleotide distribution around the PD-1 gRNA generated by CRISPResso2 (30). At each base in the reference amplicon, the percentage of each base as observed in sequencing reads is shown (A = green; C = orange; G = yellow; T =

purple). Black bars show the percentage of reads for which that base was deleted. **(B)** LD patterns were mapped relative to the Cas9 cut-site to show deletion size and location.

**Figure S28**

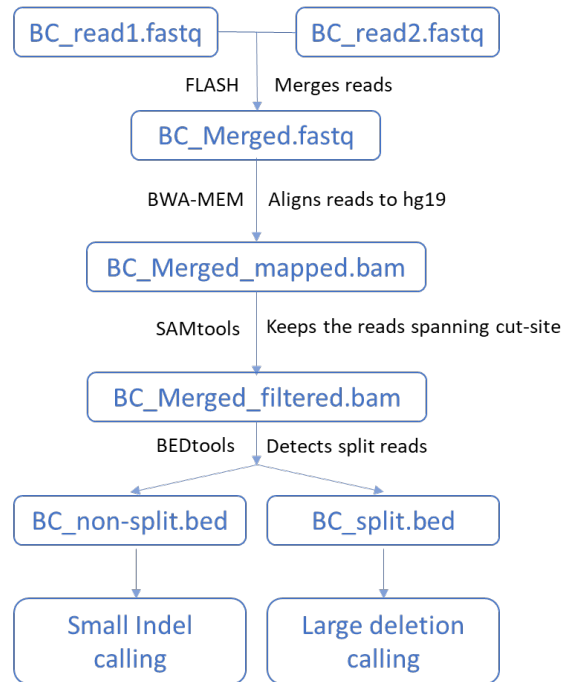

**Figure S28. LongAmp-seq bioinformatics pipeline for calling small INDELs and LDs.** The raw sequencing data from Illumina MiSeq were demultiplexed by `bcl2fastq` from Illumina and merged using FLASH (52). Merged reads were aligned to reference genome hg19 using BWA-MEM (53), and the reads that were not spanning the cut site were filtered out with SAMtools (55). The split reads were identified using BEDtools (56) and further processed to break-point based variant calling, while the small INDEL patterns were generated by CRISPResso2 (30) using the unsplit reads.

Figure S29

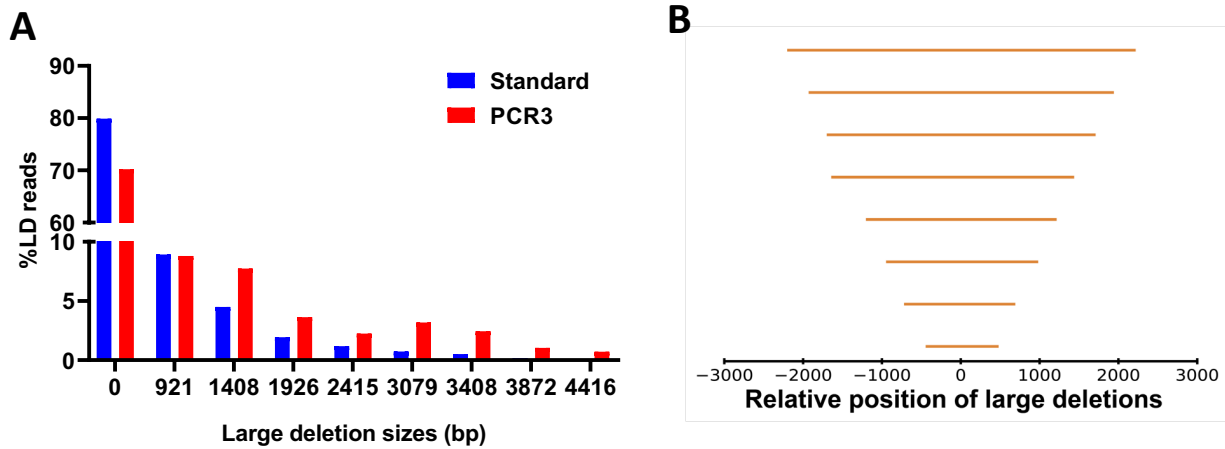

**Figure S29. Benchmark the LongAmp-seq using known mixtures of allelic variants.** The same DNA template standard with pre-determined allele frequency and PCR3 product analyzed by SMRT-seq in Supplementary Figure S11 were processed by LongAmp-seq. **(A)** LongAmp-seq measured 70% Template 9 (corresponding to unmodified HBB) while the frequency of Template 9 in the original DNA standard used for the library prep was 79.9%, showing underestimate of the unmodified allele and overestimate of the LD-containing alleles by LongAmp-seq, largely due to having more PCR duplicates of Templates 1-8 compared to that of Template 9. **(B)** LongAmp-seq identified LDs ( $\geq 200$  bp) were clustered based on their sizes and locations to identify unique LDs. Instead of UMI cluster size-based filtering used in SMRT-seq, LD patterns with below 0.01% read number of total aligned reads were considered background noise and filtered out, which removed the false-positive LDs. Each unique LD was mapped relative to the Cas9 on-target cut-site. LongAmp-seq was able to identify the correct alleles (Templates 1-9) presented in the original DNA standard.

**Figure S30**

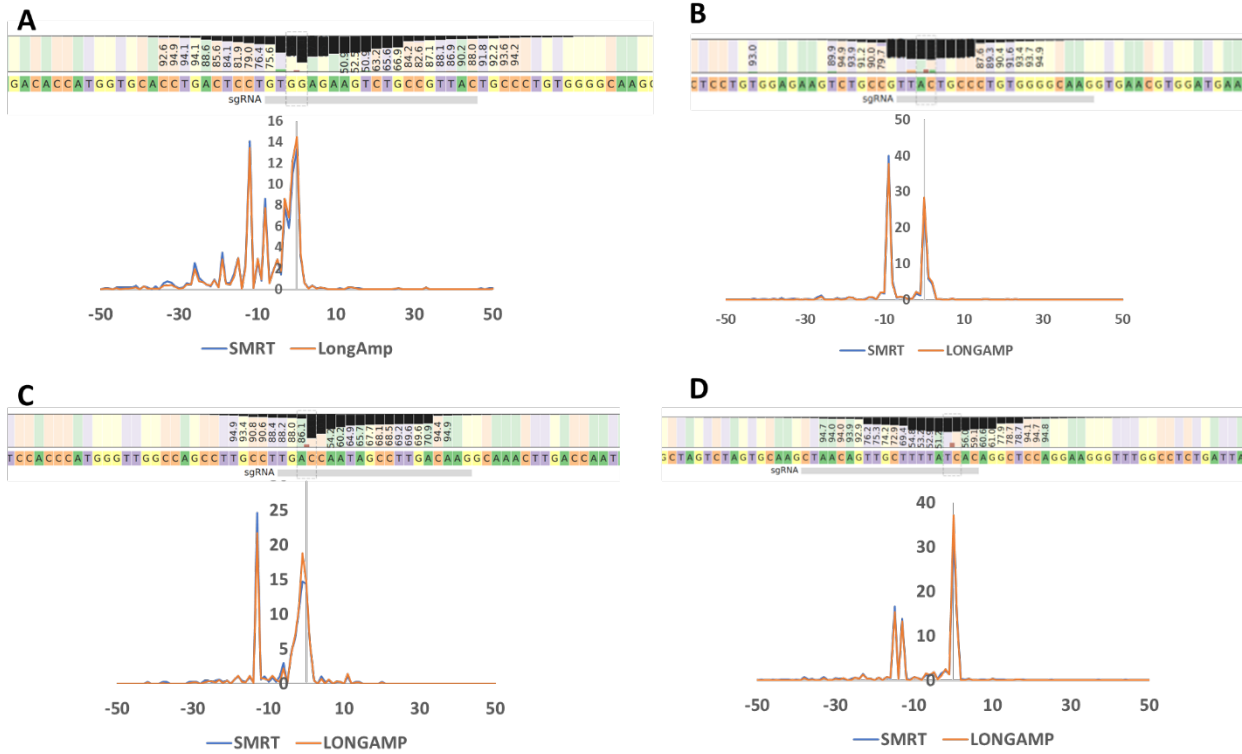

**Figure S30. Small INDEL profiles by SMRT-seq and LongAmp-seq.** The small INDELS at the (A) R-66S, (B) R-02, (C) SD-02 and (D) BCL11A RNP treated SCD HSPCs from Donor #2 were detected by SMRT-seq and LongAmp-seq assays respectively. SMRT-seq and LongAmp-seq reads without large gene modifications were processed by CRISPResso2 and showed overlapping small INDEL signatures and excellent correlation of the small INDEL rates.

Figure S31

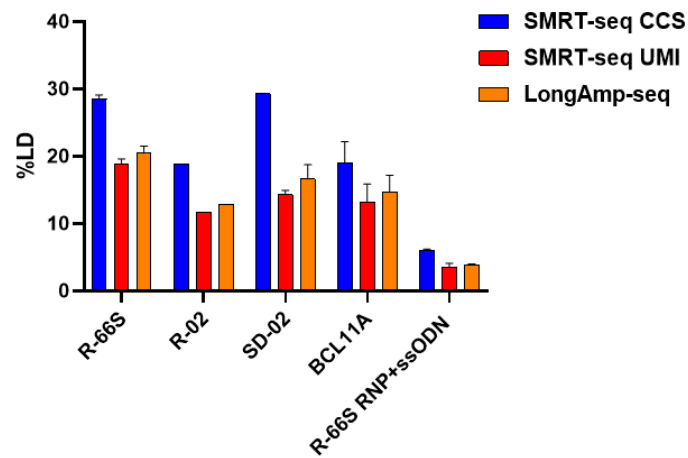

**Figure S31. LongAmp-seq and SMRT-seq quantified LDs in SCD HSPCs.** We sequenced the same set of samples by SMRT-seq and LongAmp-seq and compared SMRT-seq raw CCS (SMRT CCS), SMRT-seq with UMI filtered and consolidated (SMRT UMI) and LongAmp-seq. LD rates were consistently highest by SMRT-seq without filtering for UMI, followed by LongAmp-seq and SMRT-seq with UMI. The percentage of LDs obtained using LongAmp-seq (quantified as the number of reads containing unique LDs divided by the total reads) was compared to the LD allele frequency quantified by SMRT-seq using UMI consensus reads and showed excellent correlation, although without UMI-based correction of PCR bias and error, LongAmp-seq gave slightly higher LD rates.

Figure S32

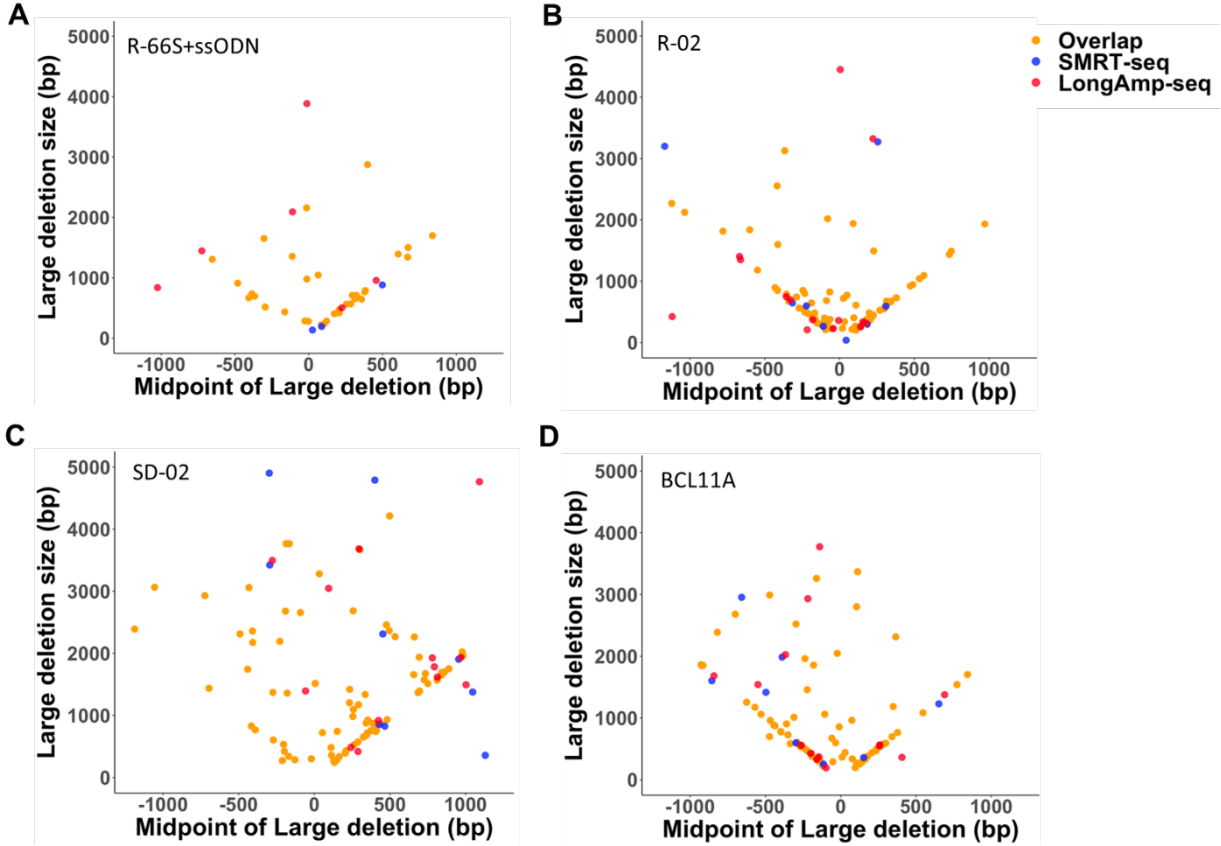

**Figure S32. Overlap between LongAmp-seq and SMRT-seq identified LD patterns in SCD HSPCs.** The LD patterns identified by SMRT-seq and LongAmp-seq were plotted based on the location of the midpoint of LD (x-axis) and LD size (y-axis). There is a high level of overlap between LongAmp-seq identified LDs and that identified by SMRT-seq. **(A)** R-66S RNP with ssODN, **(B)** R-02 RNP, **(C)** SD-02 RNP and **(D)** BCL11A RNP treated SCD HSPCs from Donor#2.

Figure S33

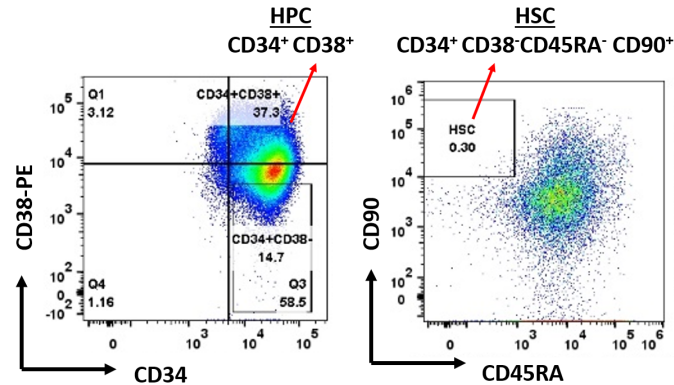

**Figure S33. SCD HSPC immunophenotyping and sorting.** After R-66S RNP, R-66S RNP and ssODN or mock electroporation, treated SCD HSPCs were recovered in the expansion media for 2 hours before the staining using fluorescently labeled antibodies (CD34, CD38, CD45RA, CD90) for HSPC subset analysis and FACS. The percentage of hematopoietic stem cells (HSCs, (CD34+CD38-CD45RA-CD90+)) was 0.3% and the percentage of hematopoietic progenitor cells (HPCs, CD34+CD38+) was 38.3%. Sorted cells were cultured for additional days to expand and gDNA was harvested for analysis by S-R NGS and LongAmp-seq.

Figure S34

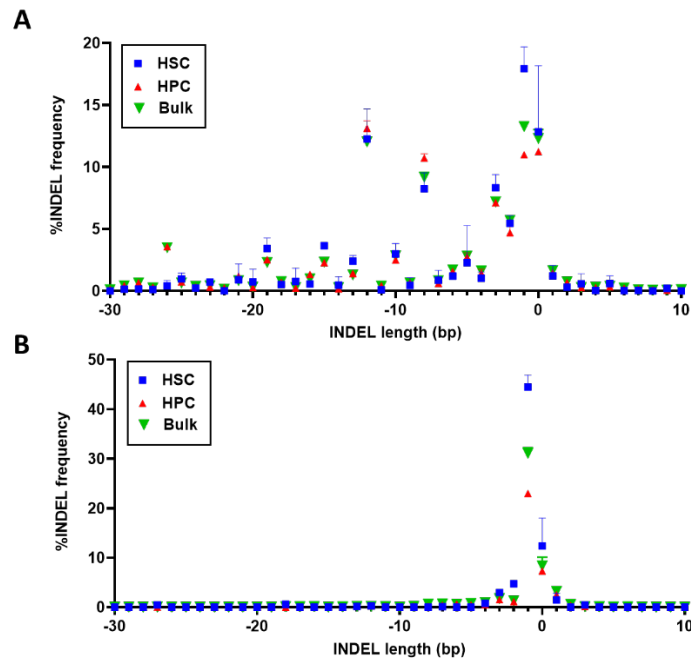

**Figure S34. Small INDEL profile in HSC, HPC and bulk HSPCs.** (A) R-66S RNP edited and sorted cells were analyzed by S-R NGS. (B) R-66S RNP and ssODN treated and sorted cells were analyzed by S-R NGS. We observed enrichment -1bp deletion produced by NHEJ accompanied by depletion MMEJ-repaired INDELS (notably, -26bp deletion with CCTGTG 5bp microhomologies) in HSCs.

**Figure S35**

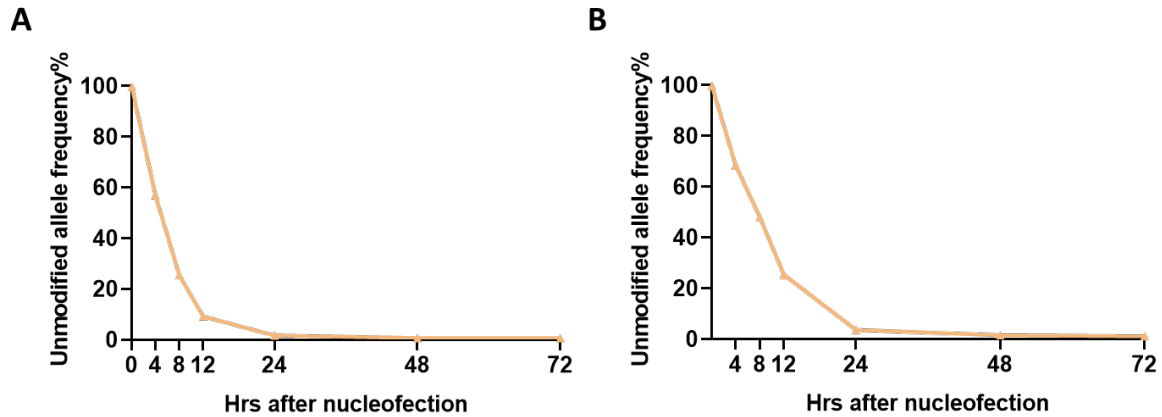

**Figure S35. Frequency of unmodified alleles in edited K562 at different time points.** (A) R-66WT RNP was electroporated into K562, harvested gDNAs at different time points over 3 days post-delivery, and analyzed the rates of LDs, NHEJ-led small INDELs (**Figure 5D**), and unmodified alleles by LongAmp-seq. (B) R-66WT RNP and ssODN were electroporated into K562, harvested gDNAs at different time points over 3 days post-delivery, and analyzed the rates of LDs, NHEJ-led small INDELs, HDR-mediated ssODN (**Figure 5E**), and unmodified alleles by LongAmp-seq.

**Figure S36**

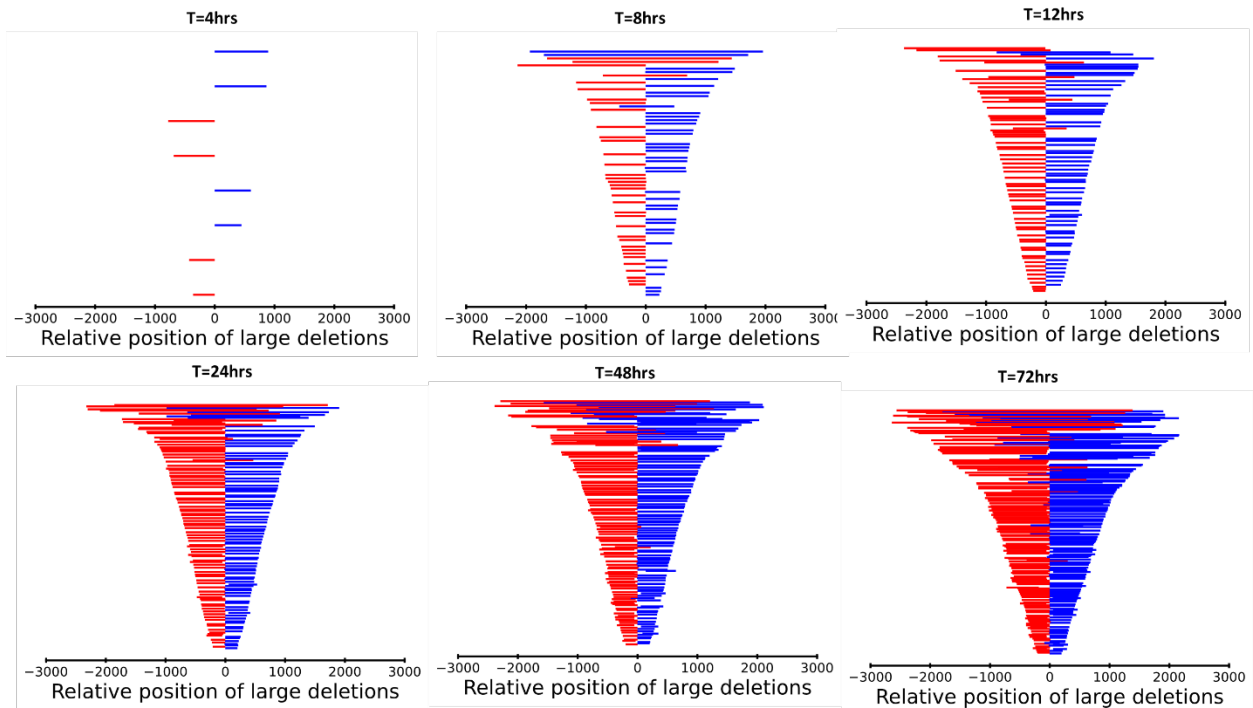



**Figure S36. Sizes and distributions of LDs in K562 cells at different time points.** The R-66WT RNP with sickle ssODN were delivered into the K562 erythroleukemia cell line and harvested gDNAs at different time points over 3 days post-delivery, and analyzed by LongAmp-seq. We compared the size distribution of LDs over time and found that the repair of longer LDs was slower than shorter LDs.

**Figure S37**

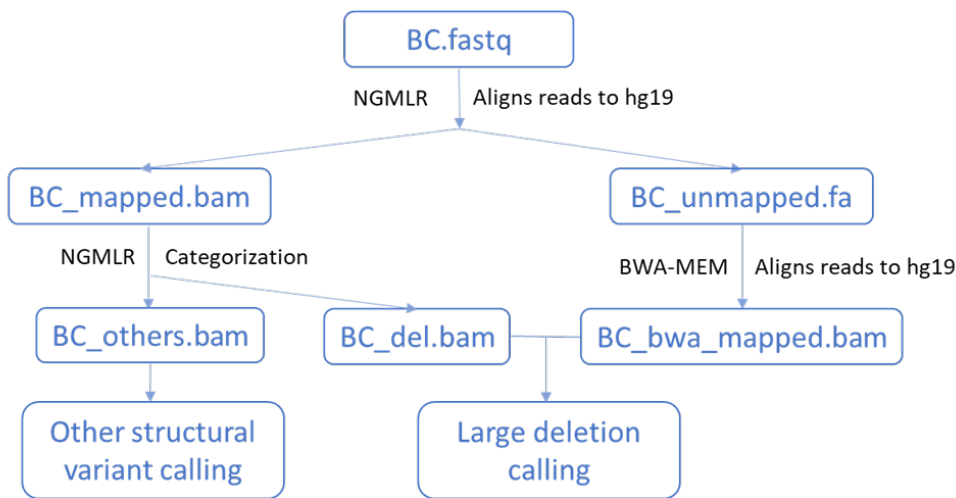

**Figure S37. Nanopore long-read sequencing bioinformatics pipeline for detecting structural variants.** FASTQ sequence files were processed into FASTQ using Guppy Basecaller. We first used NGMLR (57) to map all long reads reference human genome hg19., and the reads that mapped to the *HBB* region were analyzed for deletions and insertions calling. The reads that could not be mapped by NGMLR were further aligned by BWA-MEM (53) and filtered by SAMtools to include the chimeric reads carrying potential large deletions. The insertion profile was from NGMLR calling, and the large deletion profile included both NGMLR called reads, and BWA-MEM identified reads.

**Figure S38**

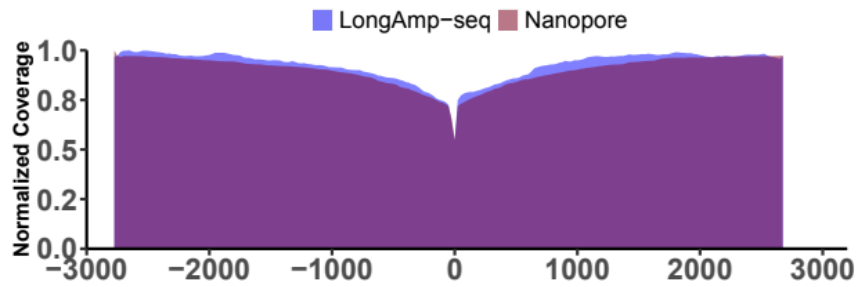

**Figure S38. Comparable read coverage depletion pattern of the RNP treated sample by LongAmp-Seq and Nanopore long-reads sequencing.** We used gDNA from 10,000 unique input alleles for L-R PCR to enrich the 5.5kb amplicons surrounding the *HBB* cut-site from R-66S HiFi RNP treated or untreated samples. L-R PCR products were processed by LongAmp-seq and Nanopore long-read sequencer in parallel with the total aligned read number for an average coverage over 70x of each allele. We observed a comparable read coverage depletion pattern of the RNP treated sample in both short- and long-reads sequencing, demonstrating that LongAmp-seq library preparation barely introduced extra bias.

**Figure S39**

**A**

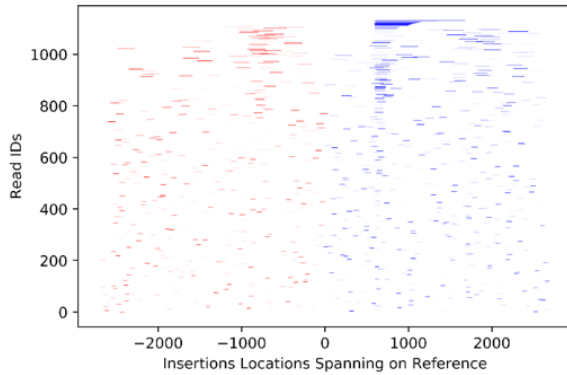

**B**

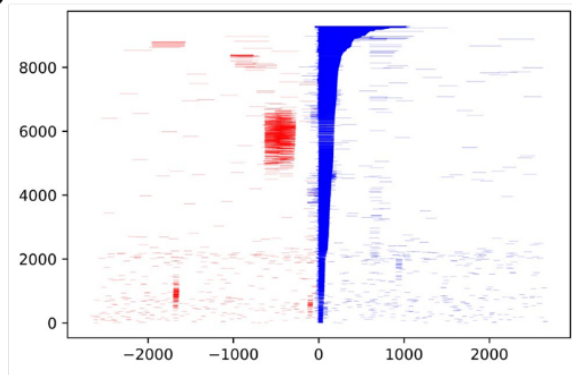

**C**

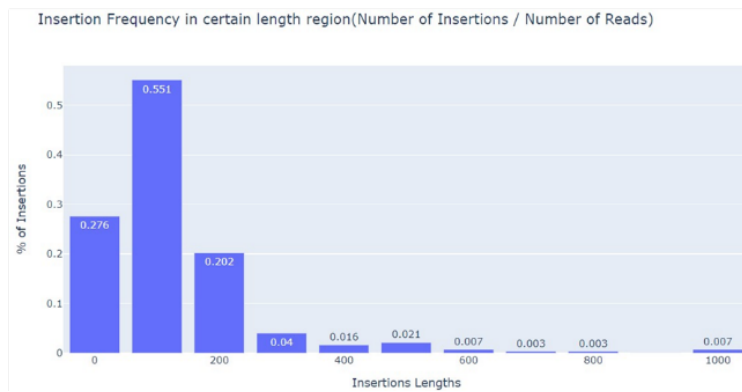

**Figure S39. Large insertion and complex repair outcomes detected by Nanopore long-read sequencing.** (A) Large insertion distributions in Untreated reads. The overall number of insertions we detected in untreated reads is 1133, from 893,629 reads in total. (B) Large insertion distributions in R-66S HiFi RNP treated reads. The overall number of insertions we detected in R-66 HiFi RNP treated reads is 9295, from 715,997 reads in total. (C) Insertion frequency among all Nanopore reads, the x-axis is the length of the insertion while the y-axis is the frequency that the insertions happen.

Supplementary Table S2. Colony genotype in S-HUDEP2 cells

| CLONE# | NGS read# | S-R NGS |         | NGS results | PCR gel shift        |                      | ddPCR copy number |           |      | Correct genotype based on 3-assays |
|--------|-----------|---------|---------|-------------|----------------------|----------------------|-------------------|-----------|------|------------------------------------|
|        |           | allele1 | allele2 |             | S-R PCR (337bp)      | L-R PCR (5.5kb)      | HBB copy#         | REF copy# | %HBB |                                    |
| C2     | 1004      | -12     | -26     | Hetero SI   | expected             | expected             |                   |           |      | Hetero SI                          |
| C3     | 923       | -10     | -3      | Hetero SI   | expected             | expected             |                   |           |      | Hetero SI                          |
| C7     | 811       | -15     | -8      | Hetero SI   | expected             | expected             |                   |           |      | Hetero SI                          |
| C8     | 595       | -12     | -1      | Hetero SI   | expected             | expected             |                   |           |      | Hetero SI                          |
| C9     | 1258      | -1      | -9      | Hetero SI   | expected             | expected             |                   |           |      | Hetero SI                          |
| C11    | 1122      | -34     | -3      | Hetero SI   | expected             | expected             |                   |           |      | Hetero SI                          |
| C12    | 163       | -2      | -1      | Hetero SI   | expected             | expected             |                   |           |      | Hetero SI                          |
| C16    | 879       | -12     | 1       | Hetero SI   | expected             | expected             |                   |           |      | Hetero SI                          |
| C20    | 732       | -8      | -4      | Hetero SI   | expected             | expected             |                   |           |      | Hetero SI                          |
| C21    | 779       | -21     | -6      | Hetero SI   | expected             | expected             |                   |           |      | Hetero SI                          |
| C22    | 780       | -21     | -5      | Hetero SI   | expected             | expected             |                   |           |      | Hetero SI                          |
| C25    | 943       | 1       | -12     | Hetero SI   | expected             | expected             |                   |           |      | Hetero SI                          |
| C26    | 1467      | -19     | -12     | Hetero SI   | expected             | expected             |                   |           |      | Hetero SI                          |
| C29    | 1137      | -8      | -6      | Hetero SI   | expected             | expected             |                   |           |      | Hetero SI                          |
| C31    | 857       | -18     | -1      | Hetero SI   | expected             | expected             |                   |           |      | Hetero SI                          |
| C35    | 877       | -26     | -19     | Hetero SI   | expected             | expected             |                   |           |      | Hetero SI                          |
| C39    | 751       | -2      | -1      | Hetero SI   | expected             | expected             |                   |           |      | Hetero SI                          |
| C40    | 627       | -21     | -8      | Hetero SI   | expected             | expected             |                   |           |      | Hetero SI                          |
| C42    | 806       | -10     | -1      | Hetero SI   | expected             | expected             |                   |           |      | Hetero SI                          |
| C43    | 1135      | -36     | -12     | Hetero SI   | expected             | expected             |                   |           |      | Hetero SI                          |
| C44    | 2024      | 1       | 109     | Hetero SI   | expected             | expected             |                   |           |      | Hetero SI                          |
| C46    | 620       | -8      | -1      | Hetero SI   | expected             | expected             |                   |           |      | Hetero SI                          |
| C47    | 1012      | -43     | -15     | Hetero SI   | expected             | expected             |                   |           |      | Hetero SI                          |
| C48    | 817       | -2      | -1      | Hetero SI   | expected             | expected             |                   |           |      | Hetero SI                          |
| C49    | 663       | -8      | 2       | Hetero SI   | expected             | expected             |                   |           |      | Hetero SI                          |
| C50    | 578       | -12     | -1      | Hetero SI   | expected             | expected             |                   |           |      | Hetero SI                          |
| C51    | 629       | -3      | -12     | Hetero SI   | expected             | expected             |                   |           |      | Hetero SI                          |
| C54    | 67        | -7      | -5      | Hetero SI   | expected             | expected             |                   |           |      | Hetero SI                          |
| C57    | 659       | -1      | -5      | Hetero SI   | expected             | expected             |                   |           |      | Hetero SI                          |
| C58    | 530       | -2      | -1      | Hetero SI   | expected             | expected             |                   |           |      | Hetero SI                          |
| C61    | 1041      | -1      | -26     | Hetero SI   | expected             | expected             |                   |           |      | Hetero SI                          |
| C62    | 937       | -6      | -15     | Hetero SI   | expected             | expected             |                   |           |      | Hetero SI                          |
| C70    | 984       | -19     | -8      | Hetero SI   | expected             | expected             |                   |           |      | Hetero SI                          |
| C71    | 994       | -8      | -3      | Hetero SI   | expected             | expected             |                   |           |      | Hetero SI                          |
| C73    | 847       | -3      | -1      | Hetero SI   | expected             | expected             |                   |           |      | Hetero SI                          |
| C74    | 1019      | -10     | -19     | Hetero SI   | expected             | expected             |                   |           |      | Hetero SI                          |
| C75    | 1161      | -8      | -18     | Hetero SI   | expected             | expected             |                   |           |      | Hetero SI                          |
| C77    | 985       | -18     | -5      | Hetero SI   | expected             | expected             |                   |           |      | Hetero SI                          |
| C78    | 1162      | -12     | -8      | Hetero SI   | expected             | expected             |                   |           |      | Hetero SI                          |
| C92    | 778       | -12     | -4      | Hetero SI   | expected             | expected             |                   |           |      | Hetero SI                          |
| C93    | 809       | -26     | -2      | Hetero SI   | expected             | expected             |                   |           |      | Hetero SI                          |
| C94    | 951       | -4      | 34      | Hetero SI   | expected             | expected             |                   |           |      | Hetero SI                          |
| C96    | 823       | -1      | 1       | Hetero SI   | expected             | expected             |                   |           |      | Hetero SI                          |
| C98    | 797       | -8      | -3      | Hetero SI   | expected             | expected             |                   |           |      | Hetero SI                          |
| C99    | 1279      | -8      | -5      | Hetero SI   | expected             | expected             |                   |           |      | Hetero SI                          |
| C102   | 912       | -15     | -1      | Hetero SI   | expected             | expected             |                   |           |      | Hetero SI                          |
| C6     |           |         |         | no reads    | no band              | 1 expected/1 smaller | 0                 | 88        | 0    | LD/LD                              |
| C17    |           |         |         | no reads    | no band              | 0 expected/2 smaller | 0                 | 125       | 0    | LD/LD                              |
| C19    |           |         |         | no reads    | no band              | no band              | 1                 | 139       | 1    | LD/LD                              |
| C28    |           |         |         | no reads    | 1 expected/1 smaller | 1 expected/1 smaller | 0                 | 139       | 0    | LD/LD                              |
| C64    |           |         |         | no reads    | no band              | 0 expected/2 smaller | 7                 | 298       | 2    | LD/LD                              |
| C65    |           | NA      |         | no reads    | no band              | 0 expected/2 smaller | 1                 | 247       | 0    | LD/LD                              |
| C53    | 449       |         | HBD     | Homo HBD    | expected             | 1 expected/1 smaller | 50                | 140       | 35   | HBD/LD                             |
| C59    | 1305      |         | HBD     | Homo HBD    | expected             | 1 expected/1 smaller | 59                | 258       | 23   | HBD/LD                             |
| C1     | 457       |         | 1       | Homo SI     | expected             | 1 expected/1 smaller | 69                | 178       | 39   | SI/LD                              |
| C4     | 1002      |         | -1      | Homo SI     | expected             | 1 expected/1 smaller | 67                | 188       | 36   | SI/LD                              |
| C5     | 860       |         | -1      | Homo SI     | expected             | 1 expected/1 smaller | 88                | 194       | 45   | SI/LD                              |
| C10    | 960       |         | -1      | Homo SI     | expected             | expected             | 42                | 139       | 30   | SI/LD                              |
| C13    | 1091      |         | -19     | Homo SI     | expected             | 1 expected/1 smaller | 103               | 280       | 37   | SI/LD                              |
| C14    | 830       |         | -26     | Homo SI     | expected             | expected             | 74                | 232       | 32   | SI/LD                              |
| C15    | 1176      |         | -21     | Homo SI     | expected             | expected             | 38                | 36        | 107  | Homo SI                            |
| C18    | 1000      |         | -8      | Homo SI     | expected             | 1 expected/1 smaller | 35                | 86        | 41   | SI/LD                              |
| C23    | 811       |         | -1      | Homo SI     | expected             | expected             | 55                | 161       | 34   | SI/LD                              |
| C24    | 344       |         | -8      | Homo SI     | 1 expected/1 smaller | expected             |                   |           |      | SI/LD                              |
| C27    | 884       |         | -8      | Homo SI     | expected             | 1 expected/1 smaller | 49                | 120       | 41   | SI/LD                              |
| C30    | 780       |         | -8      | Homo SI     | expected             | expected             | 42                | 48        | 88   | Homo SI                            |
| C32    | 959       |         | -12     | Homo SI     | expected             | 1 expected/1 smaller | 48                | 137       | 35   | SI/LD                              |
| C33    | 651       |         | -9      | Homo SI     | expected             | 1 expected/1 smaller | 60                | 161       | 37   | SI/LD                              |
| C34    | 936       |         | -1      | Homo SI     | expected             | expected             | 97                | 255       | 38   | SI/LD                              |
| C36    | 859       |         | -9      | Homo SI     | expected             | 1 expected/1 smaller | 55                | 159       | 35   | SI/LD                              |
| C37    | 793       |         | -12     | Homo SI     | expected             | 1 expected/1 smaller | 66                | 198       | 34   | SI/LD                              |
| C38    | 807       |         | -15     | Homo SI     | expected             | expected             | 83                | 238       | 35   | SI/LD                              |
| C41    | 872       |         | -19     | Homo SI     | expected             | expected             | 103               | 230       | 45   | SI/LD                              |
| C45    | 723       |         | -12     | Homo SI     | expected             | expected             | 90                | 228       | 40   | SI/LD                              |
| C52    | 701       |         | -1      | Homo SI     | expected             | expected             | 32                | 184       | 17   | SI/LD                              |
| C55    | 655       |         | -1      | Homo SI     | expected             | expected             | 62                | 249       | 25   | SI/LD                              |
| C60    | 957       |         | -1      | Homo SI     | expected             | 1 expected/1 smaller | 56                | 194       | 29   | SI/LD                              |
| C63    | 1161      |         | -19     | Homo SI     | expected             | expected             | 86                | 312       | 28   | SI/LD                              |
| C66    | 1286      |         | 1       | Homo SI     | expected             | 1 expected/1 smaller | 60                | 242       | 25   | SI/LD                              |
| C67    | 1287      |         | 1       | Homo SI     | expected             | 1 expected/1 smaller | 40                | 182       | 22   | SI/LD                              |
| C68    | 908       |         | -9      | Homo SI     | expected             | 1 expected/1 smaller | 58                | 199       | 29   | SI/LD                              |
| C69    | 705       |         | -19     | Homo SI     | 1 expected/1 smaller | expected             |                   |           |      | SI/LD                              |
| C72    | 953       |         | -12     | Homo SI     | expected             | expected             | 130               | 227       | 57   | SI/LD                              |
| C76    | 848       |         | -2      | Homo SI     | expected             | 1 expected/1 smaller | 53                | 191       | 28   | SI/LD                              |
| C79    | 1034      |         | -12     | Homo SI     | expected             | 1 expected/1 smaller | 62                | 185       | 34   | SI/LD                              |
| C80    | 1180      |         | -12     | Homo SI     | expected             | expected             | 86                | 183       | 47   | SI/LD                              |
| C81    | 1009      |         | -1      | Homo SI     | expected             | 1 expected/1 smaller | 59                | 158       | 38   | SI/LD                              |
| C82    | 1051      |         | -12     | Homo SI     | expected             | expected             | 135               | 271       | 50   | SI/LD                              |
| C83    | 1523      |         | -3      | Homo SI     | expected             | expected             | 40                | 124       | 32   | SI/LD                              |
| C84    | 1556      |         | -21     | Homo SI     | expected             | 1 expected/1 smaller | 70                | 231       | 30   | SI/LD                              |
| C85    | 1022      |         | -10     | Homo SI     | expected             | expected             | 55                | 168       | 32   | SI/LD                              |
| C86    | 871       |         | -19     | Homo SI     | expected             | 1 expected/1 smaller | 88                | 182       | 49   | SI/LD                              |
| C87    | 1029      |         | -46     | Homo SI     | expected             | 1 expected/1 smaller | 20                | 38        | 52   | SI/LD                              |
| C88    | 919       |         | -1      | Homo SI     | expected             | expected             | 26                | 29        | 88   | Homo SI                            |
| C89    | 666       |         | -5      | Homo SI     | expected             | expected             | 11                | 23        | 45   | SI/LD                              |
| C90    | 874       |         | -2      | Homo SI     | expected             | 1 expected/1 smaller | 22                | 54        | 40   | SI/LD                              |
| C91    | 831       |         | -1      | Homo SI     | expected             | expected             | 18                | 55        | 33   | SI/LD                              |
| C95    | 783       |         | -1      | Homo SI     | expected             | 1 expected/1 smaller | 58                | 107       | 54   | SI/LD                              |
| C97    | 1066      |         | -19     | Homo SI     | expected             | 1 expected/1 smaller |                   |           |      | SI/LD                              |
| C100   | 2101      |         | -8      | Homo SI     | expected             | 1 expected/1 smaller |                   |           |      | SI/LD                              |

Supplementary Table S3. Identification of colony genotype in SCD HSPCs with R-66S RNP delivery

| Sample                 | Clone#  | read# | S-R NGS   |     |           |           |         |         | S-R NGS genotype | L-R PCR   | ddPCR |       |       | Correct genotype |           |
|------------------------|---------|-------|-----------|-----|-----------|-----------|---------|---------|------------------|-----------|-------|-------|-------|------------------|-----------|
|                        |         |       | %SCD(GtG) | %SI | %HDR(Gaa) | %HBD(GaG) | allele1 | allele2 |                  |           | HBB   | RPP30 | %HBB  |                  |           |
| Biological replicate 1 | clone1  | 3021  | 0         | 99  | 1         | 0         | -12     |         | homo SI          |           | 257   | 180   | 43    | SI/LD            |           |
|                        | clone2  | 3935  | 0         | 99  | 0         | 0         | -1      | -3      | hetero SI        |           | 788   | 472   | 67    | hetero SI        |           |
|                        | clone3  | 3927  | 0         | 99  | 1         | 0         | -2      | -8      | hetero SI        |           | 707   | 401   | 76    | hetero SI        |           |
|                        | clone5  | 3184  | 0         | 11  | 2         | 86        |         | HBD     | HBD/HBD          | SHIFT     | 197   | 141   | 40    | HBD/LD           |           |
|                        | clone6  | 2401  | 0         | 87  | 2         | 10        | -6      |         | homo SI          | SHIFT     | 321   | 232   | 38    | SI/LD            |           |
|                        | clone7  | 5431  | 0         | 99  | 1         | 0         | -1      |         | homo SI          | SHIFT     | 500   | 347   | 44    | SI/LD            |           |
|                        | clone8  | 5879  | 0         | 99  | 0         | 0         | -12     |         | homo SI          |           | 329   | 167   | 97    | homo SI          |           |
|                        | clone9  | 6186  | 0         | 100 | 0         | 0         | -48     |         | homo SI          | SHIFT     | 441   | 306   | 44    | homo SI          |           |
|                        | clone10 |       |           |     | NA        |           |         |         | no band          |           | 558   | 557   | 0     | LD/LD            |           |
|                        | clone11 | 4645  | 0         | 99  | 1         | 0         | -4      | -10     |                  | hetero SI |       | 538   | 297   | 81               | hetero SI |
|                        | clone13 | 5356  | 0         | 67  | 1         | 32        | -1      | HBD     | SI/HBD           |           | 1357  | 794   | 71    | SI/HBD           |           |
|                        | clone14 | 2587  | 0         | 98  | 2         | 0         | -1      | -12     |                  | hetero SI |       | 177   | 93    | 90               | hetero SI |
|                        | clone15 | 5314  | 0         | 99  | 1         | 0         | -1      | -12     |                  | hetero SI |       | 616   | 321   | 92               | hetero SI |
|                        | clone16 | 4975  | 0         | 99  | 1         | 0         | -12     |         | homo SI          | SHIFT     | 178   | 119   | 50    | SI/LD            |           |
|                        | clone17 | 1341  | 0         | 97  | 3         | 0         | -8      |         | homo SI          |           | 653   | 450   | 45    | SI/LD            |           |
|                        | clone18 | 8328  | 0         | 99  | 1         | 0         | -8      | -15     |                  | hetero SI |       | 1417  | 717   | 98               | hetero SI |
|                        | clone19 | 4185  | 0         | 99  | 1         | 0         | -10     |         | homo SI          | SHIFT     | 1005  | 665   | 51    | SI/LD            |           |
|                        | clone20 | 2750  | 0         | 99  | 1         | 0         | -19     |         | homo SI          | SHIFT     | 768   | 525   | 46    | SI/LD            |           |
|                        | clone21 | 3940  | 0         | 99  | 1         | 0         | -12     |         | homo SI          |           | 568   | 385   | 48    | SI/LD            |           |
|                        | clone23 | 6141  | 0         | 100 | 0         | 0         | -5      | -12     |                  | hetero SI |       | 431   | 216   | 100              | hetero SI |
|                        | clone24 | 6758  | 0         | 99  | 1         | 0         | -1      | -2      |                  | hetero SI |       | 692   | 361   | 92               | hetero SI |
|                        | clone25 | 5667  | 0         | 100 | 0         | 0         | -1      | -2      |                  | hetero SI |       | 550   | 285   | 93               | hetero SI |
|                        | clone26 |       |           |     | NA        |           |         |         | no band          |           | 685   | 677   | 1     | LD/LD            |           |
|                        | clone27 | 3009  | 0         | 99  | 1         | 0         | -1      |         | homo SI          | SHIFT     | 345   | 239   | 44    | SI/LD            |           |
|                        | clone28 | 3394  | 0         | 99  | 1         | 0         | -8      | 1       |                  | hetero SI |       | 685   | 357   | 92               | hetero SI |
|                        | clone29 | 4023  | 0         | 100 | 0         | 0         | -15     | 16      |                  | hetero SI |       | 525   | 282   | 86               | hetero SI |
|                        | clone30 | 3643  | 0         | 99  | 1         | 0         | -12     | -3      |                  | hetero SI |       | 406   | 201   | 102              | hetero SI |
|                        | clone31 | 4930  | 0         | 99  | 1         | 0         | -33     |         |                  | homo SI   | SHIFT | 465   | 308   | 51               | SI/LD     |
|                        | clone32 | 6986  | 0         | 100 | 0         | 0         | -15     | -15     |                  | homo SI   | SHIFT | 362   | 235   | 54               | SI/LD     |
|                        | clone34 | 4231  | 0         | 100 | 0         | 0         | -15     | -8      |                  | hetero SI |       | 777   | 404   | 92               | hetero SI |
|                        | clone35 | 3998  | 0         | 99  | 1         | 0         | -1      |         | homo SI          | SHIFT     | 559   | 393   | 42    | SI/LD            |           |
|                        | clone36 | 3563  | 0         | 99  | 1         | 0         | -12     | 1       |                  | hetero SI |       | 447   | 234   | 91               | hetero SI |
|                        | clone37 | 6509  | 0         | 100 | 0         | 0         | -12     | -8      |                  | hetero SI |       | 660   | 338   | 95               | hetero SI |
|                        | clone38 | 3338  | 0         | 98  | 2         | 0         | -26     | -1      |                  | hetero SI |       | 731   | 443   | 65               | hetero SI |
|                        | clone39 | 4604  | 0         | 100 | 0         | 0         | -12     |         |                  | homo SI   | SHIFT | 254   | 175   | 45               | SI/LD     |
|                        | clone40 | 5153  | 0         | 99  | 0         | 0         | -1      | -5      |                  | hetero SI |       | 1073  | 590   | 82               | hetero SI |
|                        | clone41 | 3838  | 0         | 99  | 1         | 0         | -1      | -12     |                  | hetero SI |       | 288   | 155   | 86               | hetero SI |
|                        | clone42 | 3831  | 0         | 99  | 1         | 0         | -12     | -26     |                  | hetero SI |       | 523   | 270   | 94               | hetero SI |
|                        | clone43 | 3449  | 0         | 99  | 1         | 0         | -12     | -1      |                  | hetero SI |       | 525   | 265   | 98               | hetero SI |
|                        | clone44 | 2682  | 0         | 29  | 1         | 70        | -1      | HBD     | SI/HBD           |           | 623   | 390   | 60    | SI/HBD           |           |
|                        | clone46 | 4710  | 0         | 99  | 1         | 0         | -1      | -8      |                  | hetero SI |       | 528   | 273   | 93               | hetero SI |
|                        | clone47 | 3218  | 0         | 99  | 1         | 0         | -15     | 10      |                  | hetero SI |       | 417   | 216   | 93               | hetero SI |
|                        | clone48 |       |           |     | NA        |           |         |         | no band          |           | 242   | 230   | 5     | LD/LD            |           |
|                        | clone49 | 4607  | 0         | 99  | 1         | 0         | -1      |         | homo SI          |           | 786   | 394   | 99    | homo SI          |           |
|                        | clone50 | 5620  | 0         | 99  | 1         | 0         | -3      |         | homo SI          |           | 494   | 326   | 52    | SI/LD            |           |
|                        | clone51 | 3236  | 0         | 99  | 0         | 0         | -36     | -13     |                  | hetero SI |       | 610   | 298   | 105              | hetero SI |
|                        | clone52 | 3691  | 0         | 99  | 0         | 0         | -1      |         | homo SI          |           | 388   | 197   | 97    | homo SI          |           |
|                        | clone53 | 3796  | 0         | 98  | 2         | 0         | -3      |         | homo SI          |           | 202   | 138   | 46    | SI/LD            |           |
|                        | clone54 | 3092  | 0         | 99  | 1         | 0         | -1      |         | homo SI          | SHIFT     | 1043  | 697   | 50    | SI/LD            |           |
|                        | clone55 | 5342  | 0         | 100 | 0         | 0         | -1      |         | homo SI          |           | 798   | 405   | 97    | homo SI          |           |
|                        | clone56 | 6179  | 0         | 99  | 1         | 0         | -51     | -1      |                  | hetero SI |       | 343   | 163   | 110              | hetero SI |
|                        | clone57 | 3275  | 0         | 99  | 1         | 0         | -12     |         | homo SI          | SHIFT     | 431   | 317   | 36    | SI/LD            |           |
|                        | clone58 | 4758  | 0         | 99  | 1         | 0         | -15     | -8      |                  | hetero SI |       | 446   | 243   | 84               | hetero SI |
|                        | clone59 | 3570  | 0         | 99  | 1         | 0         | -16     | -12     |                  | hetero SI |       | 511   | 240   | 113              | hetero SI |
|                        | clone61 | 3965  | 0         | 99  | 1         | 0         | -15     | -8      |                  | hetero SI |       | 215   | 109   | 97               | hetero SI |
|                        | clone62 | 4307  | 0         | 98  | 2         | 0         | 3       |         | homo SI          | SHIFT     | 476   | 324   | 47    | SI/LD            |           |
|                        | clone63 | 5212  | 2         | 98  | 1         | 0         | -8      |         | homo SI          | SHIFT     | 156   | 105   | 49    | SI/LD            |           |
|                        | clone67 | 3649  | 0         | 99  | 1         | 0         | -19     | -16     |                  | hetero SI |       | 211   | 108   | 95               | hetero SI |
|                        | clone68 | 6227  | 0         | 50  | 1         | 48        | -1      | HBD     | SI/HBD           |           | 351   | 183   | 92    | SI/HBD           |           |
|                        | clone70 |       |           |     | NA        |           |         |         | no band          |           | 328   | 320   | 3     | LD/LD            |           |
|                        | clone71 | 3783  | 0         | 98  | 2         | 0         | -15     | -1      |                  | hetero SI |       | 65.8  | 30    | 119              | hetero SI |
|                        | clone72 | 4894  | 0         | 98  | 2         | 0         | -28     | -16     |                  | hetero SI |       | 104   | 45.6  | 128              | hetero SI |
|                        | clone73 | 2950  | 0         | 98  | 1         | 0         | -12     | -5      |                  | hetero SI |       | 83.8  | 44    | 90               | hetero SI |
|                        | clone74 | 3440  | 0         | 98  | 2         | 0         | -12     |         | homo SI          | SHIFT     | 117   | 73.4  | 59    | SI/LD            |           |
|                        | clone75 | 5387  | 0         | 99  | 1         | 0         | -7      |         | homo SI          | SHIFT     | 918   | 636   | 44    | SI/LD            |           |
|                        | clone76 |       |           |     | NA        |           |         |         | no band          | SHIFT     | 180   | 181   | -1    | LD/LD            |           |
|                        | clone77 | 5399  | 0         | 99  | 1         | 0         | -12     | -3      |                  | hetero SI |       | 281   | 135   | 108              | hetero SI |
|                        | clone80 | 7112  | 0         | 99  | 1         | 0         | -1      |         | homo SI          |           | 157   | 76.4  | 105   | homo SI          |           |
|                        | clone81 | 3326  | 1         | 5   | 2         | 92        |         | HBD     | HBD/HBD          |           | 119   | 79.8  | 49    | HBD/LD           |           |
|                        | clone82 |       |           |     | NA        |           |         |         | no band          |           | 24.4  | 23.4  | 4     | LD/LD            |           |
|                        | clone83 | 5198  | 0         | 99  | 1         | 0         | -45     | -16     |                  | hetero SI |       | 160   | 80.1  | 100              | hetero SI |
|                        | clone84 | 6018  | 0         | 100 | 0         | 0         | -38     | -26     |                  | hetero SI |       | 520   | 262   | 98               | hetero SI |
|                        | clone85 | 1515  | 0         | 99  | 1         | 0         | -1      |         | homo SI          |           | 154   | 104   | 48    | SI/LD            |           |
|                        | clone87 | 5667  | 1         | 98  | 1         | 0         | -28     |         | hetero SI        |           | 62    | 30.9  | 101   | hetero SI        |           |
|                        | clone88 | 8280  | 0         | 99  | 1         | 0         | -26     | -28     |                  | hetero SI |       | 149   | 67.8  | 120              | hetero SI |
|                        | clone90 | 3774  | 0         | 58  | 1         | 41        | -3      | HBD     | SI/HBD           |           | 324   | 164   | 96    | SI/HBD           |           |
| clone91                | 3909    | 0     | 99        | 1   | 0         | -15       | -1      |         | hetero SI        |           | 150   | 76.0  | 103   | hetero SI        |           |
| clone92                | 5093    | 0     | 99        | 1   | 0         | -10       | 2       |         | hetero SI        |           | 518   | 275   | 88    | hetero SI        |           |
| clone93                | 3652    | 0     | 99        | 1   | 0         | -15       | -8      |         | hetero SI        |           | 178   | 94    | 89    | hetero SI        |           |
| clone95                | 2156    | 2     | 92        | 6   | 0         | -12       |         | homo SI | SHIFT            | 47.1      | 33.5  | 41    | SI/LD |                  |           |
| clone96                | 5720    | 0     | 98        | 2   | 0         | -51       | -1      |         | hetero SI        |           | 102   | 47.4  | 115   | hetero SI        |           |
| Biological replicate 2 | clone2  | 4810  | 0         | 99  | 0         | 0         | -12     | -66     |                  | hetero SI |       | 58.7  | 31.8  | 85               | hetero SI |
|                        | clone3  | 2901  | 0         | 98  | 2         | 0         | -12     |         | homo SI          | SHIFT     | 73.7  | 52.5  | 40    | SI/LD            |           |
|                        | clone4  |       |           |     | NA        |           |         |         | no band          |           | 244   | 251   | -3    | LD/LD            |           |
|                        | clone5  | 12375 | 0         | 100 | 0         | 0         | -1      |         | homo SI          |           | 649   | 462   | 40    | SI/LD            |           |
|                        | clone7  | 10503 | 0         | 100 | 0         | 0         | -8      |         | homo SI          |           | 486   | 374   | 30    | SI/LD            |           |
|                        | clone8  | 14646 | 0         | 100 | 0         | 0         | -52     | -52     |                  | homo SI   |       | 481   | 355   | 35               | SI/LD     |
|                        | clone9  | 1485  | 0         | 93  | 7         | 0         | -1      |         | homo SI          |           | 58.6  | 31.5  | 86    | homo SI          |           |
|                        | clone10 | 1274  | 0         | 98  | 2         | 0         | 9       |         | homo SI          |           | 66    | 49.7  | 33    | SI/LD            |           |
|                        | clone11 | 3968  | 1         | 54  | 3         | 42        | -1      | HBD     | SI/HBD           |           | 73.4  | 41.6  | 76    | SI/HBD           |           |
|                        | clone12 | 11823 | 0         | 99  | 0         | 1         | -26     | -1      |                  | hetero SI |       | 848   | 498   | 70               | hetero SI |
|                        | clone13 | 8722  | 0         | 99  | 0         | 0         | -12     | 2       |                  | hetero SI |       | 269   | 152   | 77               | hetero SI |
|                        | clone14 | 14029 | 0         | 99  | 0         | 0         | -5      | -21     |                  | hetero SI |       | 549   | 360   | 53               | hetero SI |
|                        | clone15 | 7886  | 0         | 6   | 1         | 92        |         | HBD     | HBD/HBD          | SHIFT     | 236   | 151   | 56    | HBD/LD           |           |
|                        | clone17 | 4348  | 0         | 99  | 1         | 0         | -8      | -12     |                  | hetero SI |       | 177   | 91.8  | 93               | hetero SI |
|                        | clone18 | 6735  | 0         | 99  | 0         | 0         | -3      |         | homo SI          |           | 444   | 332   | 34    | SI/LD            |           |
|                        | clone19 | 3951  | 0         | 99  | 0         | 0         | -16     |         | homo SI          |           | 686   | 479   | 43    | SI/LD            |           |
|                        | clone20 | 4062  | 0         | 58  | 1         | 41        |         | HBD     | SI/HBD           |           | 139   | 75.5  | 84    | SI/HBD           |           |
|                        | clone21 | 10810 | 0         | 3   | 1         | 96        |         | HBD     | HBD/HBD          | NO BAND   | 594   | 436   | 36    | HBD/LD           |           |
|                        | clone22 | 8750  | 0         | 47  | 1         | 52        | -1      | HBD     | SI/HBD           |           | 157   | 80.7  | 95    | SI/HBD           |           |
|                        | clone23 | 4749  | 0         | 100 | 0         | 0         | -1      | -12     |                  | hetero SI |       | 809   | 444   | 82               | hetero SI |
|                        | clone24 | 4563  | 0         | 99  | 0         | 0         | -9      | -9      |                  | homo SI   |       | 500   | 272   | 84               | homo SI   |
|                        | clone27 | 6099  | 0         | 99  | 0         | 0         | -1      | -5      |                  | hetero SI |       | 393   | 201   | 96               | hetero SI |
|                        | clone29 | 3395  | 1         | 98  | 1         | 0         | -12     | 1       |                  | hetero SI |       | 15    | 6.9   | 117              | hetero SI |
|                        | clone30 | 6382  | 0         | 100 | 0         | 0         | -15     | -3      |                  | hetero SI |       | 569   | 304   | 87               | hetero SI |
|                        | clone31 | 6289  | 0         | 98  | 0         | 2         | -2      | 1       |                  | hetero SI |       | 418   | 225   | 86               | hetero SI |
|                        | clone33 | 1655  | 0         | 99  | 1         | 0         | -7      |         | homo SI          | SHIFT     | 362   | 252   | 44    | SI/LD            |           |
|                        | clone34 | 5984  | 0         | 99  | 0         | 0         | -21     |         | homo SI          |           | 231   | 124   | 86    | homo SI          |           |
|                        | clone35 | 4625  | 0         | 99  | 1         | 0         | -2      |         | homo SI          | SHIFT     | 425   | 296   | 44    | SI/LD            |           |
|                        | clone36 | 9555  | 0         | 100 | 0         | 0         | -16     | -1      |                  | hetero SI |       | 281   | 142   | 98               | hetero SI |
|                        | clone37 | 8520  | 0         | 100 | 0         | 0         | -42     | -23     |                  | hetero SI |       | 683   | 379   | 80               | hetero SI |
|                        | clone38 | 2407  | 0         | 100 | 0         | 0         | -10     | -1      |                  | hetero SI |       | 629   | 356   | 77               | hetero SI |
|                        | clone39 | 6116  | 0         | 62  | 1         | 37        | -39     | HBD     | SI/HBD           |           | 430   | 219   | 96    | SI/HBD           |           |
|                        | clone40 | 6341  | 0         | 99  | 0         | 0         | -5      |         | homo SI          |           | 103.4 | 69.3  | 49    | SI/LD            |           |
|                        | clone41 | 5234  | 0         | 99  | 1         | 0         | -2      | -12     |                  | hetero SI |       | 371   | 204   | 82               | hetero SI |
|                        | clone42 | 4607  | 0         | 99  | 1         | 0         | -8      |         | homo SI          |           | 134.9 | 91.7  | 47    | SI/LD            |           |
|                        | clone43 | 4767  | 0         | 100 |           |           |         |         |                  |           |       |       |       |                  |           |

Supplementary Table S4. Identification of colony genotype in SCD HSPCs with R-66S RNP and ssODN delivery

| Sample                | clone#   | read# | %SCD(GtG) | %SI | %HDR(Gaa) | S-R NGS   |           | allele1 | allele2   | S-R NGS genotype | L-R PCR | ddPCR |       |           | Correct genotype |
|-----------------------|----------|-------|-----------|-----|-----------|-----------|-----------|---------|-----------|------------------|---------|-------|-------|-----------|------------------|
|                       |          |       |           |     |           | %HBD(GaG) | %HBD(GaG) |         |           |                  |         | HBB   | RBP30 | %HBB      |                  |
| Biological replicate1 | clone1   | 4678  | 0         | 1   | 3         | 96        |           | HBD     |           | HBD/HBD          |         | 1974  | 1613  | 22        | HBD/LD           |
|                       | clone2   | 43318 | 0         | 0   | 100       | 0         |           | HDR     |           | HDR/HDR          |         | 1117  | 634   | 76        | HDR/HDR          |
|                       | clone9   | 23978 | 0         | 1   | 99        | 0         |           | HDR     |           | HDR/HDR          |         | 1153  | 611   | 89        | HDR/HDR          |
|                       | clone17  | 17484 | 0         | 100 | 0         | 0         |           | -1      |           | homo SI          | SHIFT   | 1412  | 932   | 52        | SI/LD            |
|                       | clone18  | 18629 | 0         | 99  | 1         | 0         |           | -12     |           | homo SI          |         | 845   | 459   | 84        | homo SI          |
|                       | clone19  | 16592 | 0         | 52  | 48        | 0         |           | HDR     | -1        | HDR/SI           |         | 1212  | 619   | 96        | HDR/SI           |
|                       | clone20  | 20831 | 0         | 100 | 0         | 0         |           | -7      | -12       | homo SI          |         | 1226  | 607   | 102       | homo SI          |
|                       | clone21  | 13113 | 0         | 57  | 42        | 0         |           | HDR     | -12       | HDR/SI           |         | 962   | 468   | 106       | HDR/SI           |
|                       | clone22  | 13899 | 0         | 0   | 99        | 0         |           | HDR     |           | HDR/HDR          | SHIFT   | 862   | 650   | 48        | HDR/LD           |
|                       | clone23  | 15510 | 0         | 0   | 99        | 0         |           | HDR     |           | HDR/HDR          |         | 1079  | 758   | 42        | HDR/LD           |
|                       | clone24  | 13779 | 0         | 95  | 5         | 0         |           | -8      | -15       | hetero SI        |         | 2175  | 1263  | 72        | hetero SI        |
|                       | clone25  | 15957 | 0         | 0   | 99        | 0         |           | HDR     |           | HDR/HDR          |         | 1823  | 982   | 86        | HDR/HDR          |
|                       | clone26  | 9414  | 0         | 3   | 97        | 0         |           | HDR     |           | HDR/HDR          |         | 853   | 432   | 97        | HDR/HDR          |
|                       | clone27  | 15743 | 0         | 52  | 48        | 0         |           | HDR     | -1        | HDR/SI           |         | 1479  | 771   | 92        | HDR/SI           |
|                       | clone28  | 21795 | 0         | 0   | 100       | 0         |           | HDR     |           | HDR/HDR          |         | 3610  | 1872  | 93        | HDR/HDR          |
|                       | clone30  | 16217 | 0         | 0   | 100       | 0         |           | HDR     |           | HDR/HDR          | SHIFT   | 1154  | 783   | 47        | HDR/LD           |
|                       | clone31  | 14441 | 0         | 99  | 1         | 0         |           | -52     | 42        | hetero SI        |         | 1568  | 834   | 88        | hetero SI        |
|                       | clone32  | 17513 | 0         | 0   | 100       | 0         |           | HDR     |           | HDR/HDR          |         | 2134  | 1177  | 81        | HDR/HDR          |
|                       | clone33  | 20830 | 0         | 0   | 100       | 0         |           | HDR     |           | HDR/HDR          |         | 1428  | 738   | 93        | HDR/HDR          |
|                       | clone34  | 20971 | 0         | 1   | 99        | 0         |           | HDR     |           | HDR/HDR          |         | 2431  | 1283  | 89        | HDR/HDR          |
|                       | clone35  | 17292 | 0         | 1   | 98        | 0         |           | HDR     |           | HDR/HDR          |         | 2342  | 1273  | 84        | HDR/HDR          |
|                       | clone37  | 13459 | 0         | 1   | 98        | 0         |           | HDR     |           | HDR/HDR          |         | 1049  | 530   | 98        | HDR/HDR          |
|                       | clone38  | 14719 | 0         | 99  | 1         | 0         |           | -1      | -19       | hetero SI        |         | 661   | 329   | 101       | hetero SI        |
|                       | clone39  | 12416 | 0         | 0   | 99        | 0         |           | HDR     |           | HDR/HDR          |         | 581   | 382   | 52        | HDR/LD           |
|                       | clone40  | 13418 | 0         | 54  | 46        | 0         |           | HDR     | -9        | HDR/SI           |         | 2639  | 1412  | 87        | HDR/SI           |
|                       | clone41  | 4389  | 0         | 2   | 98        | 0         |           | HDR     |           | HDR/HDR          |         | 1320  | 654   | 102       | HDR/HDR          |
|                       | clone42  | 16738 | 2         | 0   | 97        | 0         |           | HDR     |           | HDR/HDR          |         | 1746  | 915   | 91        | HDR/HDR          |
|                       | clone44  | 12710 | 0         | 0   | 100       | 0         |           | HDR     |           | HDR/HDR          | SHIFT   | 774   | 522   | 48        | HDR/LD           |
|                       | clone45  | 7900  | 0         | 2   | 98        | 0         |           | HDR     |           | HDR/HDR          |         | 196   | 126   | 56        | HDR/LD           |
|                       | clone46  | 10436 | 0         | 5   | 95        | 0         |           | HDR     |           | HDR/HDR          |         | 839   | 432   | 94        | HDR/HDR          |
|                       | clone47  | 11672 | 0         | 93  | 6         | 0         |           | -28     |           | homo SI          |         | 1330  | 916   | 45        | SI/LD            |
|                       | clone48  | 8387  | 0         | 68  | 32        | 0         |           | HDR     | -61       | HDR/SI           |         | 795   | 411   | 93        | HDR/SI           |
|                       | clone49  | 13987 | 0         | 1   | 99        | 0         |           | HDR     |           | HDR/HDR          |         | 1076  | 546   | 97        | HDR/HDR          |
|                       | clone50  | 10612 | 0         | 1   | 99        | 0         |           | HDR     |           | HDR/HDR          | SHIFT   | 535   | 378   | 42        | HDR/LD           |
|                       | clone51  | 7583  | 0         | 1   | 99        | 0         |           | HDR     |           | HDR/HDR          |         | 517   | 246   | 110       | HDR/HDR          |
|                       | clone53  | 12049 | 0         | 1   | 99        | 0         |           | HDR     |           | HDR/HDR          |         | 451   | 231   | 95        | HDR/HDR          |
|                       | clone54  | 11111 | 0         | 53  | 47        | 0         |           | HDR     | -2        | HDR/SI           |         | 2426  | 1265  | 92        | HDR/SI           |
|                       | clone55  | 13541 | 0         | 1   | 99        | 0         |           | HDR     |           | HDR/HDR          |         | 1713  | 836   | 83        | HDR/HDR          |
|                       | clone56  | 3099  | 0         | 98  | 2         | 0         |           | -2      |           | homo SI          |         | 1256  | 639   | 97        | homo SI          |
|                       | clone57  | 10484 | 0         | 52  | 48        | 0         |           | HDR     | 1         | HDR/SI           |         | 794   | 407   | 95        | HDR/SI           |
|                       | clone58  | 5366  | 0         | 98  | 2         | 0         |           | -2      |           | homo SI          |         | 204   | 96    | 113       | homo SI          |
|                       | clone59  | 7093  | 0         | 1   | 99        | 0         |           | HDR     |           | HDR/HDR          | SHIFT   | 775   | 514   | 51        | HDR/LD           |
|                       | clone60  | 13089 | 0         | 1   | 99        | 0         |           | HDR     |           | HDR/HDR          |         | 983   | 470   | 109       | HDR/HDR          |
|                       | clone61  | 10092 | 0         | 98  | 1         | 0         |           | -3      | -5        | hetero SI        |         | 294   | 144   | 104       | hetero SI        |
|                       | clone62  | 12408 | 0         | 1   | 98        | 0         |           | HDR     |           | HDR/HDR          |         | 2319  | 1131  | 105       | HDR/HDR          |
|                       | clone63  | 7031  | 0         | 48  | 52        | 0         |           | HDR     | -1        | HDR/SI           |         | 239   | 114   | 110       | HDR/SI           |
|                       | clone65  | 8278  | 0         | 99  | 1         | 0         |           | -8      | -62       | hetero SI        |         | 1654  | 854   | 94        | hetero SI        |
|                       | clone66  | 8905  | 0         | 1   | 98        | 0         |           | HDR     |           | HDR/HDR          |         | 1540  | 777   | 98        | HDR/HDR          |
|                       | clone68  | 12715 | 0         | 99  | 1         | 0         |           | -2      |           | homo SI          |         | 1025  | 517   | 98        | homo SI          |
|                       | clone69  | 12538 | 0         | 100 | 0         | 0         |           | -4      |           | homo SI          | SHIFT   | 1172  | 801   | 46        | SI/LD            |
|                       | clone70  | 9709  | 0         | 99  | 1         | 0         |           | -4      |           | homo SI          | SHIFT   | 923   | 618   | 49        | SI/LD            |
|                       | clone71  | 4539  | 0         | 55  | 45        | 0         |           | HDR     | -21       | HDR/SI           |         |       |       |           | HDR/SI           |
|                       | clone72  | 6002  | 0         | 51  | 49        | 0         |           | HDR     | -19       | HDR/SI           |         | 738   | 370   | 99        | HDR/SI           |
|                       | clone73  | 8647  | 0         | 99  | 1         | 0         |           | -1      |           | homo SI          |         | 1086  | 560   | 94        | homo SI          |
|                       | clone74  | 6705  | 0         | 99  | 1         | 0         |           | -1      | -21       | hetero SI        |         | 1524  | 772   | 97        | hetero SI        |
|                       | clone75  | 8822  | 0         | 1   | 99        | 0         |           | HDR     |           | HDR/HDR          |         | 627   | 318   | 97        | HDR/HDR          |
|                       | clone76  | 12438 | 0         | 100 | 0         | 0         |           | -18     | -1        | hetero SI        |         | 1152  | 579   | 99        | hetero SI        |
|                       | clone77  | 9828  | 0         | 49  | 51        | 0         |           | HDR     | -1        | HDR/SI           |         | 1497  | 711   | 111       | HDR/SI           |
|                       | clone78  | 7747  | 0         | 50  | 49        | 0         |           | HDR     | -2        | HDR/SI           |         | 419   | 205   | 104       | HDR/SI           |
|                       | clone79  | 10265 | 0         | 97  | 3         | 0         |           | -21     | -1        | hetero SI        |         | 1263  | 624   | 102       | hetero SI        |
|                       | clone80  | 8690  | 0         | 99  | 1         | 0         |           | -1      |           | homo SI          | SHIFT   | 1060  | 705   | 50        | SI/LD            |
|                       | clone81  | 4173  | 0         | 98  | 2         | 0         |           | -9      | -2        | homo SI          |         | 630   | 342   | 84        | homo SI          |
|                       | clone82  | 25713 | 0         | 0   | 100       | 0         |           | HDR     |           | HDR/HDR          |         | 654   | 335   | 95        | HDR/HDR          |
|                       | clone83  | 10676 | 39        | 59  | 2         | 0         |           | WT      | -24       | WT/SI            |         | 993   | 509   | 95        | WT/SI            |
|                       | clone84  | 7652  | 0         | 48  | 52        | 0         |           | HDR     | -1        | HDR/SI           |         | 261   | 132   | 98        | HDR/SI           |
|                       | clone85  | 12217 | 0         | 52  | 48        | 0         |           | HDR     | -1        | HDR/SI           |         | 765   | 381   | 101       | HDR/SI           |
|                       | clone86  | 7839  | 0         | 1   | 99        | 0         |           | HDR     |           | HDR/HDR          |         | 236   | 110   | 115       | HDR/HDR          |
|                       | clone87  | 13074 | 0         | 0   | 99        | 0         |           | HDR     |           | HDR/HDR          |         | 560   | 293   | 93        | HDR/HDR          |
|                       | clone88  | 11521 | 0         | 100 | 0         | 0         |           | -1      | -20       | hetero SI        |         | 467   | 240   | 95        | hetero SI        |
|                       | clone89  | 6844  | 0         | 99  | 1         | 0         |           | -2      |           | homo SI          | SHIFT   | 647   | 422   | 53        | SI/LD            |
|                       | clone90  | 10077 | 0         | 51  | 49        | 0         |           | HDR     | -1        | HDR/SI           |         | 205   | 111   | 85        | HDR/SI           |
|                       | clone91  | 6232  | 0         | 52  | 48        | 0         |           | HDR     | 1         | HDR/SI           |         | 606   | 312   | 94        | HDR/SI           |
|                       | clone92  | 8967  | 0         | 4   | 96        | 0         |           | HDR     |           | HDR/HDR          |         | 407   | 210   | 94        | HDR/HDR          |
|                       | clone93  | 8896  | 0         | 50  | 50        | 0         |           | HDR     | -2        | HDR/SI           |         | 174   | 84.8  | 105       | HDR/SI           |
|                       | clone95  | 6726  | 0         | 57  | 43        | 0         |           | HDR     | -21       | HDR/SI           |         | 235   | 122   | 93        | HDR/SI           |
|                       | clone96  | 1902  | 0         | 95  | 5         | 0         |           | -25     |           | homo SI          |         | 299   | 189   | 58        | SI/LD            |
|                       | clone97  | 12906 | 0         | 2   | 98        | 0         |           | HDR     |           | HDR/HDR          |         | 166   | 87    | 90        | HDR/HDR          |
|                       | clone98  | 11782 | 0         | 93  | 7         | 0         |           | -2      |           | homo SI          |         | 615   | 332   | 85        | homo SI          |
|                       | clone99  | 11906 | 0         | 3   | 97        | 0         |           | HDR     |           | HDR/HDR          |         | 314   | 161   | 95        | HDR/HDR          |
|                       | clone100 | 11592 | 0         | 45  | 55        | 0         |           | HDR     | -1        | HDR/SI           |         | 417   | 200   | 109       | HDR/SI           |
| clone101              | 7816     | 0     | 98        | 2   | 0         |           | -2        |         | homo SI   |                  | 1783    | 958   | 86    | homo SI   |                  |
| clone102              | 8987     | 0     | 99        | 1   | 0         |           | -10       | -3      | hetero SI |                  | 163     | 87.2  | 87    | hetero SI |                  |
| clone103              | 1521     | 0     | 98        | 2   | 0         |           | -9        | -2      | hetero SI |                  | 198     | 105   | 86    | hetero SI |                  |
| clone104              | 7530     | 0     | 3         | 97  | 0         |           | HDR       |         | HDR/HDR   |                  | 586     | 308   | 90    | HDR/HDR   |                  |
| Biological replicate2 | clone1   | 11072 | 0         | 54  | 46        | 0         |           | HDR     | -26       | HDR/SI           |         | 477   | 262   | 82        | HDR/SI           |
|                       | clone2   | 9896  | 0         | 2   | 98        | 0         |           | HDR     |           | HDR/HDR          | SHIFT   | 161   | 96    | 68        | HDR/LD           |
|                       | clone4   | 12325 | 0         | 1   | 99        | 0         |           | HDR     |           | HDR/HDR          |         | 585   | 396   | 48        | HDR/LD           |
|                       | clone5   | 17107 | 0         | 45  | 55        | 0         |           | HDR     | -5        | HDR/SI           |         | 451   | 241   | 87        | HDR/SI           |
|                       | clone6   | 21903 | 0         | 45  | 55        | 0         |           | HDR     | -1        | HDR/SI           |         | 784   | 419   | 87        | HDR/SI           |
|                       | clone7   | 11926 | 0         | 47  | 52        | 1         |           | HDR     | -1        | HDR/SI           |         | 406   | 235   | 73        | HDR/SI           |
|                       | clone8   | 17301 | 0         | 2   | 98        | 0         |           | HDR     |           | HDR/HDR          |         | 194   | 107   | 81        | HDR/HDR          |
|                       | clone9   | 5846  | 0         | 80  | 4         | 15        |           | HDR     | -19       | HDR/SI           | SHIFT   | 324   | 182   | 78        | HDR/SI           |
|                       | clone10  | 5942  | 0         | 10  | 6         | 84        |           | HBD     |           | HBD/HBD          |         | 348   | 268   | 30        | HBD/LD           |
|                       | clone11  | 20263 | 0         | 97  | 2         | 0         |           | -21     | -21       | homo SI          |         | 1576  | 836   | 89        | homo SI          |
|                       | clone12  | 18744 | 0         | 2   | 98        | 0         |           | HDR     |           | HDR/HDR          |         | 970   | 510   | 90        | HDR/HDR          |
|                       | clone13  | 13626 | 0         | 0   | 99        | 0         |           | HDR     |           | HDR/HDR          |         | 218   | 116   | 88        | HDR/HDR          |
|                       | clone14  | 22482 | 0         | 20  | 76        | 3         |           | HDR     | -19       | HDR/SI           |         | 652   | 349   | 87        | HDR/SI           |
|                       | clone16  | 12398 | 0         | 53  | 47        | 0         |           | HDR     | -7        | HDR/SI           |         | 844   | 457   | 85        | HDR/SI           |
|                       | clone17  | 14390 | 0         | 99  | 1         | 0         |           | -12     | -2        | hetero SI        |         | 1310  | 691   | 90        | hetero SI        |
|                       | clone18  | 10952 | 0         | 92  | 6         | 6         |           | -6      |           | homo SI          |         | 752   | 412   | 83        | homo SI          |
|                       | clone19  | 17471 | 0         | 99  | 1         | 0         |           | -1      | -2        | hetero SI        |         | 1462  | 793   | 84        | hetero SI        |
|                       | clone20  | 16319 | 0         | 55  | 45        | 0         |           | HDR     | -26       | HDR/SI           |         | 2084  | 1142  | 82        | HDR/SI           |
|                       | clone21  | 12192 | 0         | 1   | 93        | 6         |           | HDR     |           | HDR/HDR          |         | 3190  | 1627  | 96        | HDR/HDR          |
|                       | clone22  | 9107  | 0         | 2   | 97        | 0         |           | HDR     |           | HDR/HDR          |         | 2016  | 1102  | 83        | HDR/HDR          |
|                       | clone23  | 18434 | 0         | 1   | 99        | 0         |           | HDR     |           | HDR/HDR          |         | 1333  | 728   | 83        | HDR/HDR          |
|                       | clone24  | 18429 | 0         | 99  | 1         | 0         |           | 1       |           | homo SI          | SHIFT   | 835   | 550   | 52        | SI/LD            |
|                       | clone25  | 14567 | 0         | 98  | 2         | 0         |           | 1       |           | homo SI          | SHIFT   | 613   | 400   | 53        | SI/LD            |
|                       | clone26  | 14684 | 0         | 1   | 99        | 0         |           | HDR     |           | HDR/HDR          |         | 509   | 266   | 91        | HDR/HDR          |
|                       | clone27  | 12926 | 0         | 50  | 50        | 0         |           | HDR     | -2        | HDR/SI           |         | 782   | 408   | 92        | HDR/SI           |
|                       | clone29  | 14915 | 0         | 99  | 1         | 0         |           | -12     |           | homo SI          | SHIFT   | 691   | 463   | 49        | SI/LD            |
|                       | clone30  | 23070 | 97        | 1   | 1         | 0         |           | WT      |           | WT/WT            |         | 1004  | 521   | 93        | WT/WT            |
|                       | clone31  | 15924 | 0         | 50  | 50        | 0         |           | HDR     | -1        | HDR/SI           |         | 686   | 370   | 85        | HDR/SI           |
|                       | clone32  | 12332 | 0         | 99  | 1         | 0         |           | -3      |           | homo SI          |         |       |       |           |                  |

**Table S5. List of primer sequences**

|                 | Target    | Assay       | Amplicon size (bp) | Sequences                                               |
|-----------------|-----------|-------------|--------------------|---------------------------------------------------------|
| HBB_NGS_F       | HBB       | NGS         | 300                | TCT ACA GTC CGA CGA TCA CCC AAG AGT CTT CTC TGT CTC C   |
| HBB_NGS_R       |           |             |                    | GAC GTG TGC TCT TCC GAT CGT TGG CCA ATC TAC TCC CAG G   |
| OT18_NGS_F      | R66S OT18 | NGS         | 300                | TCT ACA GTC CGA CGA TCAGTCCCTCAACATTTGCTTATCTGAGAAGGATT |
| OT18_NGS_R      |           |             |                    | GAC GTG TGC TCT TCC GAT CCCTTGCTAGAGAGGACAACAGTCA       |
| HBG_NGS_F       | HBG       | NGS         | 300                | TCT ACA GTC CGA CGA TCA TCG GAA CAA GGC AAA GGC T       |
| HBG_NGS_R       |           |             |                    | GAC GTG TGC TCT TCC GAT CAG ACG TTC CAG AAG CGA GTG     |
| BCL11A_NGS_F    | BCL11A    | NGS         | 300                | TCT ACA GTC CGA CGA TCG CTG ATT CCA GTG CAA AGT CC      |
| BCL11A_NGS_R    |           |             |                    | GAC GTG TGC TCT TCC GAT CCA CCA AGA GAG CCT TCC GAA     |
| HBB_long_F      | HBB       | LongAmp-Seq | 5490               | AGTGGGGCTGGAATAAAAGTAGAAT                               |
| HBB_long_R      |           |             |                    | TTTTTCCTTTTGTTCCTTTGCTTC                                |
| OT18_long_F     | R66S OT18 | LongAmp-Seq | 5046               | ATG TGG AGT CTT GGC AGA GC                              |
| OT18_long_R     |           |             |                    | CCA CTA AGC CAT GTG CAG GA                              |
| HBG1_long_F     | HBG1      | LongAmp-Seq | 6718               | ACG GCA TCT GGC TTT TCT CA                              |
| HBG1_long_R     |           |             |                    | GCG TGA AAA GCA ATT GCA GC                              |
| HBG_10kb_F      | HBG1&2    | LongAmp-Seq | 10,339             | GGT TCC CCA GTG AGG ATG TG                              |
| HBG_10kb_R      |           |             |                    | CCC CAG GTC TTC ACT GAA CC                              |
| BCL11A_long_F   | BCL11A    | LongAmp-Seq | 4268               | TCA ATT CAG GAG CGG CAG TT                              |
| BCL11A_long_R   |           |             |                    | GTT GCC ATG TGG GTT GTG AC                              |
| GFPBFP inout_F3 | GFPBFP    | LongAmp-Seq | 9423               | GCCAGGCATCTTGAGGTTCT                                    |
| GFPBFP inout_R3 |           |             |                    | CCACCTCCCCAGAGTCTTA                                     |
| HBB_211bp_F     | HBB       | ddPCR       | 211                | GCAGAGCCATCTATTGCTTACA                                  |
| HBB_211bp_R     |           |             |                    | CTCCACATGCCAGTTTCTATT                                   |
| HBG_ddPCR_F2    | HBG       | ddPCR       | 225                | GCC CCT TCC CCA CAC TAT CT                              |
| HBG_ddPCR_R2    |           |             |                    | AGA CGT TCC AGA AGC GAG TG                              |
| RPP30_F         | RPP30     | ddPCR       | 62                 | GAT TTG GAC CTG CGA GCG                                 |
| RPP30_R         |           |             |                    | GCG GCT GTC TCC ACA AGT                                 |
| CACNA1C_ref_F   | CACNA1C   | ddPCR       | 293                | CTCTCCTATAGCTGCATGCACACCC                               |
| CACNA1C_ref_R   |           |             |                    | GAGAGTGCCTGGTCTTTACTGCAGG                               |

**Table S6: Details of large insertions in SCD HSPCs treated by R-66S RNP**

| UMI ID   | Chr   | Start position | End position | Match | Mismatch | Strand | nearest gene | Other mutation on the allele | Feature           |
|----------|-------|----------------|--------------|-------|----------|--------|--------------|------------------------------|-------------------|
| umi4269  | chr11 | 4494366        | 5248397      | 330   | 19       | -      | HBB          | Intermediate deletion        |                   |
| umi2381  | chr11 | 4761870        | 5248396      | 315   | 10       | -      | HBB          | Intermediate deletion        |                   |
| umi6451  | chr11 | 5247913        | 5248396      | 431   | 18       | -      | HBB          | Intermediate deletion        |                   |
| umi334   | chr11 | 5245393        | 5245874      | 479   | 2        | +      | HBB          | LD                           |                   |
| umi53    | chr11 | 5247543        | 5248223      | 677   | 3        | +      | HBB          | LD                           |                   |
| umi26804 | chr11 | 5247543        | 5248223      | 676   | 4        | +      | HBB          | LD                           |                   |
| umi1162  | chr11 | 5247598        | 5248225      | 625   | 1        | +      | HBB          | LD                           |                   |
| umi393   | chr11 | 5247598        | 5248225      | 625   | 1        | +      | HBB          | LD                           |                   |
| umi136   | chr11 | 5247618        | 5248228      | 606   | 4        | +      | HBB          | LD                           |                   |
| umi3148  | chr11 | 5247755        | 5248203      | 447   | 1        | +      | HBB          | LD                           |                   |
| umi1509  | chr11 | 5247918        | 5248220      | 302   | 0        | +      | HBB          | LD                           |                   |
| umi604   | chr11 | 5247918        | 5248220      | 302   | 0        | +      | HBB          | LD                           |                   |
| umi573   | chr11 | 5247918        | 5248220      | 302   | 0        | +      | HBB          | LD                           |                   |
| umi511   | chr11 | 5247918        | 5248219      | 301   | 0        | +      | HBB          | LD                           |                   |
| umi23398 | chr11 | 5248024        | 5248219      | 195   | 0        | +      | HBB          | LD                           |                   |
| umi464   | chr11 | 5248231        | 5248604      | 367   | 1        | +      | HBB          | LD                           |                   |
| umi407   | chr11 | 5248231        | 5248604      | 368   | 0        | +      | HBB          | LD                           |                   |
| umi1575  | chr11 | 5248232        | 5249240      | 1000  | 4        | +      | HBB          | LD                           |                   |
| umi124   | chr11 | 5248232        | 5249240      | 1000  | 7        | +      | HBB          | LD                           |                   |
| umi21495 | chr11 | 5248232        | 5249240      | 999   | 5        | +      | HBB          | LD                           |                   |
| umi14733 | chr11 | 5248232        | 5248716      | 482   | 2        | +      | HBB          | LD                           |                   |
| umi469   | chr11 | 5248232        | 5248716      | 482   | 2        | +      | HBB          | LD                           |                   |
| umi468   | chr11 | 5248232        | 5248716      | 482   | 2        | +      | HBB          | LD                           |                   |
| umi24156 | chr11 | 5248232        | 5248716      | 482   | 2        | +      | HBB          | LD                           |                   |
| umi27345 | chr11 | 5248232        | 5248530      | 297   | 1        | +      | HBB          | LD                           |                   |
| umi21585 | chr11 | 5248233        | 5248990      | 749   | 7        | +      | HBB          | LD                           |                   |
| umi1131  | chr11 | 5248235        | 5248902      | 449   | 2        | +      | HBB          | LD                           |                   |
| umi5     | chr11 | 5248235        | 5248902      | 449   | 2        | +      | HBB          | LD                           |                   |
| umi21336 | chr11 | 5248237        | 5248582      | 344   | 1        | +      | HBB          | LD                           |                   |
| umi4647  | chr11 | 5248482        | 5248556      | 74    | 0        | -      | HBB          | LD                           |                   |
| umi21538 | chr11 | 5248592        | 5249070      | 470   | 5        | +      | HBB          | LD                           |                   |
| umi231   | chr11 | 5248592        | 5249070      | 470   | 5        | +      | HBB          | LD                           |                   |
| umi240   | chr11 | 5248595        | 5248745      | 149   | 1        | +      | HBB          | LD                           |                   |
| umi512   | chr11 | 5248984        | 5250810      | 495   | 2        | -      | HBB          | LD                           |                   |
| umi2908  | chr11 | 5247926        | 5248230      | 304   | 0        | -      | HBB          | Small INDEL or unmodified    |                   |
| umi1361  | chr11 | 5247926        | 5248230      | 304   | 0        | -      | HBB          | Small INDEL or unmodified    |                   |
| umi670   | chr11 | 5248036        | 5248381      | 195   | 0        | -      | HBB          | Small INDEL or unmodified    |                   |
| umi3677  | chr11 | 5248038        | 5248226      | 188   | 0        | -      | HBB          | Small INDEL or unmodified    |                   |
| umi4454  | chr11 | 5248089        | 5248212      | 123   | 0        | -      | HBB          | Small INDEL or unmodified    |                   |
| umi24215 | chr11 | 5248240        | 5248397      | 156   | 1        | -      | HBB          | Small INDEL or unmodified    |                   |
| umi29106 | chr11 | 5248241        | 5248398      | 156   | 1        | -      | HBB          | Small INDEL or unmodified    |                   |
| umi350   | chr11 | 5248243        | 5248408      | 165   | 0        | -      | HBB          | Small INDEL or unmodified    |                   |
| umi5376  | chr11 | 5248258        | 5248396      | 138   | 0        | -      | HBB          | Small INDEL or unmodified    |                   |
| umi1930  | chr11 | 5248464        | 5248961      | 491   | 5        | -      | HBB          | Small INDEL or unmodified    |                   |
| umi324   | chr11 | 5248541        | 5248595      | 54    | 0        | +      | HBB          | Small INDEL or unmodified    |                   |
| umi24482 | chr11 | 5255654        | 5255724      | 70    | 0        | -      | HBB          | Small INDEL or unmodified    |                   |
| umi24256 | chr1  | 156274244      | 156274482    | 238   | 0        | -      | CCT3         | Intermediate deletion        |                   |
| umi15339 | chr1  | 156274244      | 156274482    | 238   | 0        | -      | CCT3         | Intermediate deletion        |                   |
| umi8842  | chr1  | 249167824      | 249167901    | 77    | 0        | +      | ZNF692       | LD                           | telomeric end     |
| umi4008  | chr1  | 249167824      | 249167901    | 77    | 0        | +      | ZNF692       | LD                           | telomeric end     |
| umi114   | chr1  | 249167824      | 249167901    | 77    | 0        | +      | ZNF692       | LD                           | telomeric end     |
| umi96    | chr1  | 249167824      | 249167901    | 77    | 0        | +      | ZNF692       | LD                           | telomeric end     |
| umi4543  | chr2  | 209079878      | 209080191    | 311   | 2        | +      | IDH1         | Intermediate deletion        |                   |
| umi28409 | chr2  | 43294306       | 43294511     | 205   | 0        | +      | ZFP36L2      | Small INDEL or unmodified    |                   |
| umi18570 | chr3  | 195360569      | 195360868    | 299   | 0        | -      | APOD         | Intermediate deletion        |                   |
| umi29378 | chr3  | 186594586      | 186594761    | 175   | 0        | +      | ADIPOQ       | Small INDEL or unmodified    |                   |
| umi2367  | chr3  | 186594586      | 186594761    | 175   | 0        | +      | ADIPOQ       | Small INDEL or unmodified    |                   |
| umi5112  | chr4  | 79549296       | 79549509     | 213   | 0        | +      | ANXA3        | Small INDEL or unmodified    |                   |
| umi384   | chr6  | 145112099      | 145112419    | 319   | 1        | -      | UTRN         | Intermediate deletion        |                   |
| umi5260  | chr6  | 44013226       | 44013364     | 138   | 0        | +      | MRPL14       | Small INDEL or unmodified    |                   |
| umi1625  | chr11 | 50534706       | 50534911     | 205   | 0        | -      | OR4C45       | LD                           | repetitive region |
| umi423   | chr11 | 50534706       | 50534911     | 205   | 0        | -      | OR4C45       | LD                           | repetitive region |
| umi4649  | chr15 | 83768216       | 83768439     | 223   | 0        | +      | TM6SF1       | Small INDEL or unmodified    |                   |
| umi23013 | chr19 | 17911596       | 18068193     | 289   | 0        | -      | B3GNT3       | Intermediate deletion        |                   |
| umi4405  | chr19 | 649811         | 649953       | 142   | 0        | -      | RNF126       | Small INDEL or unmodified    | repetitive region |
| umi2383  | chr19 | 649811         | 649953       | 142   | 0        | -      | RNF126       | Small INDEL or unmodified    | repetitive region |
| umi19487 | chr19 | 649811         | 649953       | 142   | 0        | -      | RNF126       | Small INDEL or unmodified    | repetitive region |



**Table S7: LongAmp-seq sequencing depth and read numbers**

| Sample           | Amplicon size | #raw reads | #merged reads | %merged | #reads spanning cutsite | %reads spanning cutsite | #unsplit reads | #split reads |
|------------------|---------------|------------|---------------|---------|-------------------------|-------------------------|----------------|--------------|
| R-66S_RNP1       | 5189          | 662665     | 343775        | 51.88   | 26532                   | 7.72                    | 19570          | 6962         |
| R-66S_RNP2       | 5189          | 560531     | 263200        | 46.96   | 19188                   | 7.29                    | 14225          | 4963         |
| R-66S_RNP+ssODN1 | 5189          | 592468     | 321981        | 54.35   | 23996                   | 7.45                    | 22462          | 1534         |
| R-66S_RNP+ssODN2 | 5189          | 282153     | 129842        | 46.02   | 9703                    | 7.47                    | 9143           | 560          |
| R-02_RNP1        | 5189          | 847726     | 440590        | 51.97   | 32414                   | 7.36                    | 26306          | 6108         |
| R-02_RNP2        | 5189          | 851877     | 457074        | 53.65   | 34116                   | 7.46                    | 28182          | 5934         |
| SD-02_RNP1       | 6578          | 446223     | 202732        | 45.43   | 11741                   | 5.79                    | 9473           | 2268         |
| SD-02_RNP2       | 6578          | 585425     | 255978        | 43.73   | 13462                   | 5.26                    | 11062          | 2400         |
| BCL11A_RNP1      | 4351          | 543214     | 280898        | 51.71   | 24211                   | 8.62                    | 20334          | 3877         |
| BCL11A_RNP2      | 4351          | 746080     | 382749        | 51.30   | 33449                   | 8.74                    | 26517          | 6932         |
